# Supplementary material for: Use of routine health information systems to monitor disruptions of coverage of maternal, newborn, and child health services during COVID-19: A scoping review
Source: PubMed Central journal article supplement (PMC9910560; doi:10.7189/jogh.13.06002), 2023-02-10
Supplement: jogh-13-06002-s001.pdf [file jogh-13-06002-s001.pdf]

|    | A                                                                                         | C                                                                                                                                                                                                   | D                                                                                                              | E                      | F                | G                 | H            | I          | J                   | K            | M             | N    | O                                                                                                                                                                      | P                | S                           | T                          | U                                             | V                  | Y                                      |
|----|-------------------------------------------------------------------------------------------|-----------------------------------------------------------------------------------------------------------------------------------------------------------------------------------------------------|----------------------------------------------------------------------------------------------------------------|------------------------|------------------|-------------------|--------------|------------|---------------------|--------------|---------------|------|------------------------------------------------------------------------------------------------------------------------------------------------------------------------|------------------|-----------------------------|----------------------------|-----------------------------------------------|--------------------|----------------------------------------|
| 1  | <b>Supplemental File 1: MNCAH Services during COVID-19 using RHIS - Abstraction Sheet</b> |                                                                                                                                                                                                     |                                                                                                                |                        |                  |                   |              |            |                     |              |               |      |                                                                                                                                                                        |                  |                             |                            |                                               |                    |                                        |
| 2  |                                                                                           |                                                                                                                                                                                                     |                                                                                                                |                        |                  |                   |              |            |                     |              |               |      |                                                                                                                                                                        |                  |                             |                            |                                               |                    |                                        |
| 3  | 1st Author                                                                                | Title                                                                                                                                                                                               | Citation                                                                                                       | MOH or Manager Authors | Reference Source | Region            | Income Group | Country    | Populations Covered | Topic (s)    | RHIS Type     | DQA  | Data Period                                                                                                                                                            | FU beyond Sept20 | Data Trends - MNCH Services | Data Trends Morb/Mortality | Data used for program adjustments/ mitigation | Response Category  | Outcome/ Impact                        |
| 4  | Abdela                                                                                    | Essential Healthcare Services in the Face of COVID-19 Prevention: Experiences from a Referral Hospital in Ethiopia                                                                                  | Am. J. Trop. Med. Hyg. 103(3), 2020, pp. 1198-1200 doi:10.4269/ajtmh.20-0464                                   | No                     | Peer             | AFRO              | LMIC         | Ethiopia   | MCH                 | EMS          | Paper HMIS    | None | Feb-March 22 2020 vs March 23-April 2021                                                                                                                               | No               | Mixed                       |                            | None                                          |                    | NA                                     |
| 5  | Abdul-Mumin                                                                               | Decrease in Admissions and Change in the Diagnostic Landscape in a Newborn Care Unit in Northern Ghana During the COVID-19 Pandemic                                                                 | Front. Pediatr. 9:642508. doi: 10.3389/fped.2021.642508                                                        | No                     | Peer             | AFRO              | LMIC         | Ghana      | Newborn             | Neonatal     | Hosp IS       | None | March to August 2019 vs 2020                                                                                                                                           | No               | Decrease                    | IncreaseMM                 | None                                          |                    | NA                                     |
| 6  | Abebe                                                                                     | Trends of follow-up clinic visits and admissions three-months before and during COVID-19 pandemic at Tikur Anbessa specialized hospital, Addis Ababa, Ethiopia: an interrupted time series analysis | BMC Health Services Research (2021) 21:731 https://doi.org/10.1186/s12913-021-06730-8                          | No                     | Peer             | AFRO              | LMIC         | Ethiopia   | Children            | Child Health | Hosp IS       | None | follow-up visits and admissions between December 11, 2019, to June 7, 2020, with the 1st case of the COVID-19 report in Ethiopia (March 13, 2020) as a reference time. | No               | Decrease                    |                            | None                                          |                    | NA                                     |
| 7  | Abel                                                                                      | Coronavirus Disease 2019 (COVID-19) and the Incidence of Obstetric and Gynecologic Emergency Department Visits in an Integrated Health Care System                                                  | Obstet Gynecol 2021;137:581-83 DOI: 10.1097/AOG.00000000000004331                                              | No                     | Peer             | PAHO              | HIC          | USA        | Maternal            | EMS          | EMR/HER       | None | Jan-Dec 2019-2020                                                                                                                                                      | Yes              | Decrease with recovery      |                            | None                                          |                    | NA                                     |
| 8  | Ackerson                                                                                  | Pediatric Vaccination During the COVID-19 Pandemic                                                                                                                                                  | PEDIATRICS Volume 148, number 1, July 2021:e2020047092                                                         | No                     | Peer             | PAHO              | HIC          | USA        | Children            | Immunization | EMR/HER       | None | Jan-Aug 2019-2020                                                                                                                                                      | No               | Decrease with recovery      |                            | Yes                                           | Data for targeting | Recovery of vaccination rates          |
| 9  | Ahmed                                                                                     | Indirect effects on maternal and child mortality from the COVID-19 pandemic: evidence from disruptions in healthcare utilization in 18 low- and middle-income countries                             | Lancet Preprint Available at SSRN: https://ssrn.com/abstract=3916767 or http://dx.doi.org/10.2139/ssrn.3916767 | Yes                    | Pre-pub          | AFRO, SEARO, PAHO | LMIC         | Multiple   | MCH                 | MCH          | HMIS          | None | pre-pandemic (January 2018 – February 2020) and the pandemic (March 2020 – June 2021) periods                                                                          | No               | Decrease                    |                            | None                                          |                    | NA                                     |
| 10 | Ahmed                                                                                     | The effect of COVID-19 on maternal newborn and child health (MNCH) services in Bangladesh, Nigeria and South Africa: call for a contextualised pandemic response in LMICs                           | International Journal for Equity in Health (2021) 20:77 https://doi.org/10.1186/s12939-021-01414-5             | No                     | Peer             | AFRO, SEARO       | LMIC         | Multiple   | MCH                 | MCH          | HMIS, Hosp IS | None | March-May 2019 vs 2020                                                                                                                                                 | No               | Decrease                    |                            | None                                          |                    | NA                                     |
| 11 | Ainul                                                                                     | Trends in maternal health services in Bangladesh before, during and after CO and after COVID-19 lock VID-19 lockdowns: Evidence fr evidence from national r om national routine service data        | https://knowledgecommons.popcouncil.org/departments_sbsr-rh/1299/                                              | No                     | Grey             | SEARO             | LMIC         | Bangladesh | Maternal            | Mat Health   | HMIS          | None | 2019 vs 2020                                                                                                                                                           | Yes              | Decrease with recovery      |                            | None                                          |                    | NA                                     |
| 12 | Aizawa                                                                                    | Changes in childhood vaccination during the coronavirus disease 2019 pandemic in Japan                                                                                                              | Vaccine 39 (2021) 4006-4012 https://doi.org/10.1016/j.vaccine.2021.05.050                                      | Yes                    | Peer             | WPRO              | HIC          | Japan      | Children            | Immunization | Hosp IS       | None | January and September during the years 2016-2020                                                                                                                       | Yes              | Decrease with recovery      |                            | Yes                                           | Info Campaign      | Retained Childhood vaccination levels. |

|    | A         | C                                                                                                                                                                                      | D                                                                                              | E   | F       | G                 | H         | I                                                                                                               | J        | K               | M             | N    | O                                                                                                                                                                                                                                                                                                                                                                                                                                                                   | P                        | S        | T                             | U        | V               | Y                               |
|----|-----------|----------------------------------------------------------------------------------------------------------------------------------------------------------------------------------------|------------------------------------------------------------------------------------------------|-----|---------|-------------------|-----------|-----------------------------------------------------------------------------------------------------------------|----------|-----------------|---------------|------|---------------------------------------------------------------------------------------------------------------------------------------------------------------------------------------------------------------------------------------------------------------------------------------------------------------------------------------------------------------------------------------------------------------------------------------------------------------------|--------------------------|----------|-------------------------------|----------|-----------------|---------------------------------|
| 13 | Akuake    | Cross-sectional study of paediatric case mix presenting to an emergency centre in Cape Town, South Africa, during COVID-19                                                             | BMJ Paediatrics Open 2020;4:e000801. doi:10.1136/bmjpo-2020-000801                             | Yes | Peer    | AFRO              | LMIC      | South Africa                                                                                                    | Children | EMS             | EMS IS        | None | lockdown period (27 March 2020–30 April 2020) was compared with similar 5-week periods immediately before (21 February 2020–26 March 2020) and after the lockdown (1 May 2020–4 June 2020), and to similar time periods during 2018 and 2019                                                                                                                                                                                                                        | No                       | Mixed    |                               | None     |                 | NA                              |
| 14 | Alrabiah  | Effects of the Coronavirus disease 2019 pandemic on routine paediatric immunization coverage rates at the main University Hospital in Saudi Arabia                                     | Saudi Med J 2020; Vol. 41 (11)                                                                 | No  | Peer    | EMRO              | HIC       | Saudi Arabia                                                                                                    | Children | Immunization    | EMR/EHR       | None | March-May 2017-2020                                                                                                                                                                                                                                                                                                                                                                                                                                                 | No                       | Decrease |                               | None     |                 | NA                              |
| 15 | Alsuleman | Paediatric asthma exacerbation admissions and stringency of non-pharmaceutical interventions: Results from a developing country                                                        | IJCP 02 June 2021 https://doi.org/10.1111/ijcp.14423                                           | No  | Peer    | EMRO              | LMIC      | Jordan                                                                                                          | Children | Child Health    | EMR/HER       | None | Jan-Dec 2018,2019,2020                                                                                                                                                                                                                                                                                                                                                                                                                                              | Yes                      |          | DecreaseMM                    | No       |                 | NA                              |
| 16 | Amazou    | Health service utilisation during the COVID-19 pandemic in sub-Saharan Africa in 2020: a multicountry empirical assessment with a focus on maternal, newborn and child health services | BMJ Global Health 2022;7:e008069. doi:10.1136/bmjgh-2021-008069                                | Yes | Peer    | AFRO              | LMIC      | Burkina Faso, Cote d'Ivoire, Ghana, Liberia, Mali, Niger, Nigeria, Ethiopia, Kenya, Tanzania, Uganda and Zambia | MCH      | MCH             | HMIS          | None | YES CONFIRM National completeness was over 90% in most countries during 2017–2020 and there was no major decline in monthly reporting during 2020. Nigeria is an exception with considerably lower reporting rates than the other countries: high reporting completeness and manageable number of outliers and missing values, summarised with data quality measures, as well as the consistency of findings across countries, give good confidence in the results. | March-December 2017-2020 | Yes      | Decrease with slight recovery | No       |                 | NA                              |
| 17 | Angeles   | Two Years of the COVID-19 Pandemic: Estimating the Effects on Essential Health Services Utilization in Uganda and Bangladesh                                                           | https://doi.org/10.21203/rs.3.rs-1371550/v1                                                    | Yes | Pre-pub | AFRO, SEARO       | LMIC      | Uganda, Bangladesh                                                                                              | MCH      | MCH             | HMIS          | None | YES Less than 0.2% of data points for each service within each country were deemed outliers. In all services in Uganda and all services in Bangladesh except for the immunization-related services, there was very little change in reporting across the time series and no change in reporting during the COVID-19 period.                                                                                                                                         | Jan 2017-May 2021        | Yes      | Decrease with slight recovery | No       |                 | NA                              |
| 18 | Aranda    | Disruptions in maternal health service use during the COVID-19 pandemic in 2020: experiences from 37 health facilities in low-income and middle-income countries                       | BMJ Global Health 2022;7:e007247. doi:10.1136/bmjgh-2021-007247                                | Yes | Peer    | AFRO, PAHO        | LMIC      | Haiti, Lesotho, Liberia, Malawi, Mexico and Sierra Leone                                                        | Maternal | Maternal Health | HMIS, EMR/HER | None | NO Outliers identified through Tukey's rule (larger than 1.5 times the interquartile range) were returned to the country's monitoring and evaluation officer for correction or removal.                                                                                                                                                                                                                                                                             | Jan 2016-Dec2020         | Yes      | Decrease with recovery        | Yes      | Multiple        | Minimal reduction with recovery |
| 19 | Arnaez    | Lack of changes in preterm delivery and stillbirths during COVID-19 lockdown in a European region                                                                                      | European Journal of Pediatrics (2021) 180:1997–2002 https://doi.org/10.1007/s00431-021-03984-6 | No  | Peer    | EURO              | HIC       | Spain                                                                                                           | Newborn  | Neonatal        | Hosp IS       | None | NO Cleaned duplicates from linked dataset                                                                                                                                                                                                                                                                                                                                                                                                                           | 2015 til June2020        | No       | Stable                        | StableMM | No              | NA                              |
| 20 | Arsenault | COVID-19 and resilience of healthcare systems in ten countries                                                                                                                         | Nature Medicine, https://doi.org/10.1038/s41591-022-01750-1                                    | Yes | Peer    | AFRO, PAHO, SEARO | LMIC, HIC | Haiti, Ghana, Lao People's Democratic Republic, Mexico, Nepal, South Africa, Thailand, Chile and                | MCH      | MCH             | HMIS          | None | NO Cleaned missing and outliers, excluded facilities with high missing. Did not comment on whether increased missing due to COVID reporting.                                                                                                                                                                                                                                                                                                                        | Jan 2019-December 2020   | Yes      | Decrease with slight recovery | No       |                 | NA                              |
| 21 | Ashish    | The perfect storm: Disruptions to institutional delivery care arising from the COVID-19 pandemic in Nepal                                                                              | J Glob Health 2021;11:05010. www.jogh.org + doi: 10.7389/jogh.11.05010                         | Yes | Peer    | SEARO             | LMIC      | Nepal                                                                                                           | Maternal | Maternal Health | Hosp IS       | None | March to August in 2019 with the same months in 2020).                                                                                                                                                                                                                                                                                                                                                                                                              | No                       | Mixed    |                               | None     |                 | NA                              |
| 22 | Athiraman | Impact of COVID-19 on maternity and neonatal servicesThree year-on-year review data from the North East of England                                                                     | Acta Paediatrica. 2022;111:1039–1041                                                           | Unk | Peer    | EURO              | HIC       | UK                                                                                                              | MNH      | MNH             | Hosp IS       | None | March-June 2018, 2019, 2020                                                                                                                                                                                                                                                                                                                                                                                                                                         | No                       | Mixed    |                               | Yes      | Protocol Change | MM no impact                    |

|    | A                  | C                                                                                                                                                                                    | D                                                                                                                                                                                                                                                                                     | E   | F       | G                | H    | I                                                                                               | J        | K               | M        | N                                                                                                                                                                                                                                                                                                                                                                                                                                           | O                                                     | P   | S                      | T | U    | V                                          | Y                                                                                                                                                                                                                                            |
|----|--------------------|--------------------------------------------------------------------------------------------------------------------------------------------------------------------------------------|---------------------------------------------------------------------------------------------------------------------------------------------------------------------------------------------------------------------------------------------------------------------------------------|-----|---------|------------------|------|-------------------------------------------------------------------------------------------------|----------|-----------------|----------|---------------------------------------------------------------------------------------------------------------------------------------------------------------------------------------------------------------------------------------------------------------------------------------------------------------------------------------------------------------------------------------------------------------------------------------------|-------------------------------------------------------|-----|------------------------|---|------|--------------------------------------------|----------------------------------------------------------------------------------------------------------------------------------------------------------------------------------------------------------------------------------------------|
| 23 | Ayele              | Patterns of essential health services utilization and routine health information management during Covid-19 pandemic at primary health service delivery point Addis Ababa, Ethiopia. | Ethiopian Journal of Health Development; 35(Special Issue 1):90-97, 2021. <a href="https://www.ajol.info/index.php/ejhd/issue/view/19839">https://www.ajol.info/index.php/ejhd/issue/view/19839</a>                                                                                   | No  | Peer    | AFRO             | LMIC | Ethiopia                                                                                        | MCH      | MCH             | HMIS     | YES Data accuracy and HIS performance show reductions. There was a significant decrease in Lot Quality assurance and sampling (LQAS) and Performance monitoring team (PMT) service during the COVID-19 pandemic. The reason was that most of the health workforce was partially or fully reassigned to support COVID-19 so that PMT meeting and LQAS were discontinued, and reporting was not done timely.                                  | November 2019 to June 2020                            | No  | Stable                 |   | Yes  | Info Campaign                              | MCH Services were maintained but concern continues if pandemic worsens                                                                                                                                                                       |
| 24 | Azizatunnisa'      | Maintaining Polio-Free Status in Indonesia During the COVID-19 Pandemic                                                                                                              | Glob Health Sci Pract. 2022;10(1):e2100310. <a href="https://doi.org/10.9745/GHSP-D-21-00310">https://doi.org/10.9745/GHSP-D-21-00310</a>                                                                                                                                             | Yes | Peer    | SEARO            | LMIC | Indonesia                                                                                       | Children | Immunizations   | HMIS     | None                                                                                                                                                                                                                                                                                                                                                                                                                                        | 2011-2020                                             | Yes | Decrease               |   | Yes  | Multiple                                   | NA                                                                                                                                                                                                                                           |
| 25 | Babatunde          | Impact of COVID-19 on routine immunization in Oyo State, Nigeria: Trend analysis of immunization data in the pre-and post-index case period; 2019 – 2020                             | <a href="https://doi.org/10.21203/rs.3.rs-308066/v1">https://doi.org/10.21203/rs.3.rs-308066/v1</a>                                                                                                                                                                                   | Yes | Pre-pub | AFRO             | LMIC | Nigeria                                                                                         | Children | Immunization    | HMIS     | NO Data were sorted; cleaned and relevant variables extracted                                                                                                                                                                                                                                                                                                                                                                               | July 2019-Aug2020                                     | No  | Decrease               |   | No   |                                            | NA                                                                                                                                                                                                                                           |
| 26 | Babu               | Zambia efforts in prevention, early detection and treatment of wasting during COVID-19                                                                                               | <a href="https://www.enonline.net/attachments/3760/FEX-64-Web_28Jan2021_60-63.pdf">https://www.enonline.net/attachments/3760/FEX-64-Web_28Jan2021_60-63.pdf</a>                                                                                                                       | Yes | Grey    | AFRO             | LMIC | Zambia                                                                                          | Children | Child Health    | HMIS     | None                                                                                                                                                                                                                                                                                                                                                                                                                                        | Jan-Oct 2019 & 2020                                   | Yes | Increase               |   | Yes  | Multiple                                   | The rapid integration of COVID-19 prevention activities into the nutrition programme, through the flexibility granted by donors to redesign project activities and the prompt implementation of these measures by partners, is a key success |
| 27 | Badran             | Adverse pregnancy outcomes during the COVID-19 lockdown. A descriptive study                                                                                                         | BMC Pregnancy and Childbirth (2021) 21:761 <a href="https://doi.org/10.1186/s12884-021-04221-6">https://doi.org/10.1186/s12884-021-04221-6</a>                                                                                                                                        | No  | Peer    | EMRO             | LMIC | Jordan                                                                                          | MNH      | Stillbirth      | Registry | None                                                                                                                                                                                                                                                                                                                                                                                                                                        | May 2019 to March 2020 vs April 2020 to December 2020 | Yes | Mixed                  |   | No   |                                            | NA                                                                                                                                                                                                                                           |
| 28 | Bailey             | The impact of COVID-19 on multi-month dispensing (MMD) policies for antiretroviral therapy (ART) and MMD uptake in 21 PEPFAR-supported countries: a multi-country analysis           | Journal of the International AIDS Society 2021, 24(S6):e25794 <a href="http://onlinelibrary.wiley.com/doi/10.1002/jia2.25794/full">http://onlinelibrary.wiley.com/doi/10.1002/jia2.25794/full</a> <a href="https://doi.org/10.1002/jia2.25794">https://doi.org/10.1002/jia2.25794</a> | No  | Peer    | AFRO, PAHO,SEARO | LMIC | Cote d'Ivoire<br>Democratic Republic of the Congo<br>Dominican Republic<br>Eswatini<br>Ethiopia | Children | HIV/TB          | HMIS     | None                                                                                                                                                                                                                                                                                                                                                                                                                                        | Oct2019 Dec2020                                       | Yes | Increase               |   | Yes  | Supply Chain, policy 3m to 6m distribution | old, virologic suppression was 71% in Q4 2019 (286,000 clients) and steadily increased to 80% in Q4 2020 (326,000 clients). Consistently increasing rates of viral suppression were maintained across nearly all                             |
| 29 | Banke-Thomas       | A mixed-methods study of maternal health care utilisation in six referral hospitals in four sub-Saharan African countries before and during the COVID-19 pandemic                    | BMJ Global Health 2022;7:e008064. doi:10.1136/bmjgh-2021-008064                                                                                                                                                                                                                       | Yes | Peer    | AFRO             | LMIC | Guinea,<br>Nigeria,<br>Tanzania,<br>Uganda                                                      | Maternal | Maternal Health | HMIS     | None                                                                                                                                                                                                                                                                                                                                                                                                                                        | Mar to Feb 2019-2021                                  | Yes | Decrease with recovery |   | Yes  | Lockdown eased                             | it is important to highlight here that a perception of the pandemic being over whether self-perceived or government-induced appears to have been sufficient for change in utilisation patterns.                                              |
| 30 | Barasa             | Indirect health effects of the COVID-19 pandemic in Kenya: a mixed methods assessment                                                                                                | Barasa et al. BMC Health Services Research (2021) 21:740 <a href="https://doi.org/10.1186/s12913-021-06726-4">https://doi.org/10.1186/s12913-021-06726-4</a>                                                                                                                          | Yes | Peer    | AFRO             | LMIC | Kenya                                                                                           | MCH      | MCH             | HMIS     | YES Assessed the data for missing values and outliers and adjusted for reporting rates. We replaced the outlier value using the median value. The quantitative analysis of changes in the level of service utilization is prone to bias from several sources including well document data quality issues of HMIS data, the likely impact of the pandemic on information systems (e.g. disruptions in reporting), and the lack of a control. | January 2019 and November 2020                        | Yes | Mixed                  |   | None |                                            | NA                                                                                                                                                                                                                                           |
| 31 | Barbiellini Amidei | Pediatric emergency department visits during the COVID-19 pandemic: a large retrospective population-based study                                                                     | Italian Journal of Pediatrics (2021) 47:218 <a href="https://doi.org/10.1186/s13052-021-01168-4">https://doi.org/10.1186/s13052-021-01168-4</a>                                                                                                                                       | Yes | Peer    | EURO             | HIC  | Italy                                                                                           | Children | EMS             | Hosp IS  | None                                                                                                                                                                                                                                                                                                                                                                                                                                        | Jan 2019-Dec 2020                                     | Yes | Decrease               |   | No   |                                            | NA                                                                                                                                                                                                                                           |

|    | A                  | C                                                                                                                                                            | D                                                                                                                                                                                           | E   | F       | G     | H    | I            | J        | K            | M                     | N                                                                                                                                                                                                                                                               | O                                                                | P   | S     | T                      | U        | V                       | Y                                           |    |
|----|--------------------|--------------------------------------------------------------------------------------------------------------------------------------------------------------|---------------------------------------------------------------------------------------------------------------------------------------------------------------------------------------------|-----|---------|-------|------|--------------|----------|--------------|-----------------------|-----------------------------------------------------------------------------------------------------------------------------------------------------------------------------------------------------------------------------------------------------------------|------------------------------------------------------------------|-----|-------|------------------------|----------|-------------------------|---------------------------------------------|----|
| 32 | Barbieri           | Antibiotic Prescription Patterns in the Paediatric Primary Care Setting before and after the COVID-19 Pandemic in Italy: An Analysis Using the AWaRe Metrics | Antibiotics 2022, 11, 457. <a href="https://doi.org/10.3390/antibiotics11040457">https://doi.org/10.3390/antibiotics11040457</a>                                                            | No  | Peer    | EURO  | HIC  | Italy        | Children | Child Health | Hosp IS               | None                                                                                                                                                                                                                                                            | Feb 2019 to March 2021                                           | Yes | Mixed |                        | No       |                         | NA                                          |    |
| 33 | Basatemur          | Paediatric critical care referrals of children with diabetic ketoacidosis during the COVID-19 pandemic                                                       | Arch Dis Child April 2021 Vol 106 No 4                                                                                                                                                      | Yes | Peer    | EURO  | HIC  | UK           | Children | Child Health | Hosp IS               | None                                                                                                                                                                                                                                                            | Jan 2018-July 2020                                               | No  |       | IncreaseMM             | No       |                         | NA                                          |    |
| 34 | Been,              | Impact of COVID-19 mitigation measures on the incidence of preterm birth: a national quasi-experimental study                                                | Lancet Public Health 2020; 5:e604-11 Published Online October 13, 2020 <a href="https://doi.org/10.1016/S2468-2667(20)30223-1">https://doi.org/10.1016/S2468-2667(20)30223-1</a>            | Yes | Peer    | EURO  | HIC  | Netherlands  | Newborn  | Neonatal     | Hosp IS               | YES Cross-validation against Perined data for selected years (2011, 2014, and 2017) showed that babies born at the lowest gestational ages- and those with the lowest birthweights were consistently underrepresented in our cohort throughout the study period | Nov 2019-june 2020                                               | No  |       | DecreaseMM             | No       |                         | NA                                          |    |
| 35 | Bekele             | Impact of COVID-19 Pandemic on Utilization of Facility-Based Essential Maternal and Child Health Services in North Shewa Zone, Ethiopia                      | <a href="https://doi.org/10.1101/2021.10.22.2268794">https://doi.org/10.1101/2021.10.22.2268794</a>                                                                                         | Yes | Pre-pub | AFRO  | LMIC | Ethiopia     | MCH      | MCH          | HMIS                  | None                                                                                                                                                                                                                                                            | March to August 2019 and March to August 2020                    | No  |       | Decrease               |          | No                      | NA                                          |    |
| 36 | Bence              | COVID-19 pre-procedural testing strategy and early outcomes at a large tertiary care children's hospital                                                     | Pediatric Surgery International (2021) 37:871-880 <a href="https://doi.org/10.1007/s00383-021-04878-2">https://doi.org/10.1007/s00383-021-04878-2</a>                                       | No  | Peer    | PAHO  | HIC  | USA          | Children | Child Health | Hosp IS               | None                                                                                                                                                                                                                                                            | March 16, 2020 to October 31, 2020 compared to pre-covid average | Yes |       | Decrease with recovery | Yes      | Epidemic Prev & Control | Recovered to pre-covid levels of procedures |    |
| 37 | Bents              | The impact of COVID-19 non-pharmaceutical interventions on future respiratory syncytial virus transmission in South Africa                                   | <a href="https://doi.org/10.1101/2022.03.12.22271872">https://doi.org/10.1101/2022.03.12.22271872</a>                                                                                       | No  | Pre-pub | AFRO  | LMIC | South Africa | Children | Child Health | Surveillance          | None                                                                                                                                                                                                                                                            | January 2015-August 2021                                         | Yes |       | DecreaseMM             | No       |                         | NA                                          |    |
| 38 | Berghella          | Decreased incidence of preterm birth during coronavirus disease 2019 pandemic                                                                                | American Journal of Obstetrics & Gynecology MFM Volume 4, Issue 3, May 2022, 100577 <a href="https://doi.org/10.1016/j.ajogmf.2020.100258">https://doi.org/10.1016/j.ajogmf.2020.100258</a> | No  | Peer    | PAHO  | HIC  | USA          | Newborn  | Neonatal     | Hosp IS               | None                                                                                                                                                                                                                                                            | March to July 2019 and 2020                                      | No  |       | DecreaseMM             | No       |                         | NA                                          |    |
| 39 | Bertin Ayu Wandira | Impact of the COVID-19 Pandemic on Integrated Health Service for Child (Posyandu) Management in Palu City                                                    | Macedonian Journal of Medical Sciences. 2022 Feb 20; 10(E):243-247. <a href="https://doi.org/10.3889/oajmms.2022.8149">https://doi.org/10.3889/oajmms.2022.8149</a> eISSN: 1857-9655        | No  | Peer    | SEARO | LMIC | Indonesia    | MCH      | MCH          | HMIS                  | None                                                                                                                                                                                                                                                            | 2018-2020                                                        | Yes |       | Stable                 | Yes      | Policy                  | Visits maintained                           |    |
| 40 | Bhatia             | Decision-to-delivery interval and neonatal outcomes for category-1 caesarean sections during the COVID-19 pandemic                                           | Anaesthesia 2021 <a href="https://doi.org/10.1111/anae.15489">doi:10.1111/anae.15489</a>                                                                                                    | No  | Peer    | EURO  | HIC  | UK           | Maternal | Mat Health   | EMR/EHR & Paper MR/HR | None                                                                                                                                                                                                                                                            | 1 April 2019 and 1 July 2019 compared to same period in 2020     | No  |       | Mixed                  | StableMM | Yes                     | Epidemic Prev & Control                     | NA |
| 41 | Bhopal             | Who has been missed? Dramatic decrease in numbers of children seen for child protection assessments during the pandemic                                      | Arch Dis Child 2021;106:e6. <a href="https://doi.org/10.1136/archdischild-2020-319783">doi:10.1136/archdischild-2020-319783</a>                                                             | Yes | Peer    | EURO  | HIC  | UK           | Children | Child Abuse  | HMIS                  | None                                                                                                                                                                                                                                                            | Jan-Apr 2018-2020                                                | No  |       | Decrease               |          | No                      | NA                                          |    |
| 42 | Bogh               | Nationwide study on trends in unplanned hospital attendance and deaths during the 7 weeks after the onset of the COVID-19 pandemic in Denmark                | BMI Qual Saf 2021;30:986-995. <a href="https://doi.org/10.1136/bmjqs-2020-012144">doi:10.1136/bmjqs-2020-012144</a>                                                                         | Yes | Peer    | EURO  | HIC  | Denmark      | Children | EMS          | Hosp IS               | None                                                                                                                                                                                                                                                            | 2017 to April 2020                                               | No  |       | Mixed                  |          | No                      | NA                                          |    |
| 43 | Bornstein          | Early postpartum discharge during the COVID-19 pandemic                                                                                                      | J. Perinat. Med. 2020; 48(9): 1008-1012 <a href="https://doi.org/10.1515/jpm-2020-0337">https://doi.org/10.1515/jpm-2020-0337</a>                                                           | Unk | Peer    | PAHO  | HIC  | USA          | MNH      | MNH          | EMR                   | NO In addition, given the retrospective design with information based on review of medical records, not all charts had complete data available regarding pregnancy-related complications.                                                                       | December 8th, 2019 and June 20th, 2020                           | No  |       | Decrease               |          | No                      | NA                                          |    |

|    | A         | C                                                                                                                                                             | D                                                                                                                                                                                                                                                                                                                                                                                         | E   | F       | G                       | H         | I                                                                                                    | J        | K                           | M           | N                                        | O                                      | P   | S                      | T        | U    | V | Y  |
|----|-----------|---------------------------------------------------------------------------------------------------------------------------------------------------------------|-------------------------------------------------------------------------------------------------------------------------------------------------------------------------------------------------------------------------------------------------------------------------------------------------------------------------------------------------------------------------------------------|-----|---------|-------------------------|-----------|------------------------------------------------------------------------------------------------------|----------|-----------------------------|-------------|------------------------------------------|----------------------------------------|-----|------------------------|----------|------|---|----|
| 44 | Bothara   | Paediatric presentations to Christchurch Hospital Emergency Department during COVID-19 lockdown                                                               | Journal of Paediatrics and Child Health 57 (2021) 877–882                                                                                                                                                                                                                                                                                                                                 | Yes | Peer    | WPRO                    | HIC       | New Zealand                                                                                          | Children | EMS                         | EMR         | None                                     | Feb-Apr 2018-2020                      | No  | Decrease               |          | No   |   | NA |
| 45 | Bramer    | Decline in Child Vaccination Coverage During the COVID-19 Pandemic — Michigan Care Improvement Registry, May 2016–May 2020                                    | MMWR / May 22, 2020 / Vol. 69 / No. 20                                                                                                                                                                                                                                                                                                                                                    | Yes | Peer    | PAHO                    | HIC       | USA                                                                                                  | Children | Immunization                | EIR         | None                                     | May in 2016-2020                       | No  | Decrease               |          | None |   | NA |
| 46 | Brown     | Impact of COVID-19 on Pediatric Primary Care Visits at Four Academic Institutions in the Carolinas                                                            | Int. J. Environ. Res. Public Health 2021, 18, 5734. <a href="https://doi.org/10.3390/ijerph18115734">https://doi.org/10.3390/ijerph18115734</a>                                                                                                                                                                                                                                           | No  | Peer    | PAHO                    | HIC       | USA                                                                                                  | Children | EMS                         | EMR/EHR     | None                                     | April 2019 or April 2020               | No  | Decrease               |          | None |   | NA |
| 47 | BT Evans  | Worldwide routine immunisation coverage regressed during the first year of the COVID-19 pandemic                                                              | <a href="https://doi.org/10.1101/2021.12.03.21267195">https://doi.org/10.1101/2021.12.03.21267195</a>                                                                                                                                                                                                                                                                                     | No  | Pre-pub | AFRO, SEARO, WPRO, PAHO | LMIC      | India<br>Pakistan<br>Indonesia<br>Philippines<br>Mexico<br>Uganda<br>Peru<br>Mozambique<br>Argentina | Children | Immunization                | HMIS        | NO WUENIC                                | 2020 Expected vs Actual                | Yes | Decrease               |          | No   |   | NA |
| 48 | Bullinger | Pediatric emergency department visits due to child abuse and neglect following COVID-19 public health emergency declaration in the Southeastern United States | BMC Pediatrics (2021) 21:401 <a href="https://doi.org/10.1186/s12887-021-02870-2">https://doi.org/10.1186/s12887-021-02870-2</a>                                                                                                                                                                                                                                                          | No  | Peer    | PAHO                    | HIC       | USA                                                                                                  | Children | Child Abuse                 | Paper MR/HR | None                                     | January through June 2018–2020         | No  | Mixed                  |          | None |   | NA |
| 49 | Buonsenso | Child Healthcare and Immunizations in Sub-Saharan Africa During the COVID-19 Pandemic                                                                         | Front. Pediatr., 06 August 2020   <a href="https://doi.org/10.3389/fped.2020.00517">https://doi.org/10.3389/fped.2020.00517</a>                                                                                                                                                                                                                                                           | Yes | Peer    | AFRO                    | LMIC      | Sierra Leone                                                                                         | Children | Immunization & Child Health | Paper HMIS  | None                                     | Jan-March 2019 vs Jan-March 2020       | No  | Decrease               | StableMM | None |   | NA |
| 50 | Burger    | Examining the unintended consequences of the COVID-19 pandemic on public sector health facility visits: the first 150 days                                    | <a href="https://resep.sun.ac.za/wp-content/uploads/2021/02/16-Examining-the-unintended-consequences-of-the-COVID-19-pandemic-on-public-sector-health-facility-visits-The-first-150-days-2.pdf">https://resep.sun.ac.za/wp-content/uploads/2021/02/16-Examining-the-unintended-consequences-of-the-COVID-19-pandemic-on-public-sector-health-facility-visits-The-first-150-days-2.pdf</a> | No  | Grey    | AFRO                    | LMIC      | South Africa                                                                                         | MCH      | MCH                         | HMIS        | None                                     | January 2018 to August 2020            | No  | Decrease               |          | None |   | NA |
| 51 | Burt      | Indirect effects of COVID-19 on maternal, neonatal, child, sexual and reproductive health services in Kampala, Uganda                                         | BMJ Global Health 2021;6:e006102. doi:10.1136/bmjgh-2021-006102                                                                                                                                                                                                                                                                                                                           | No  | Peer    | AFRO                    | LMIC      | Uganda                                                                                               | MCH      | MCH                         | Hosp IS     | None                                     | 1 July 2019 and 31 December 2020,      | Yes | Decrease               | MixedMM  | None |   | NA |
| 52 | Byun      | The impact of the COVID-19 pandemic on outpatients of internal medicine and pediatrics                                                                        | Medicine: February 25, 2022 - Volume 101 - Issue 8 - p e28884 doi: 10.1097/MD.0000000000002884                                                                                                                                                                                                                                                                                            | No  | Peer    | WPRO                    | HIC       | South Korea                                                                                          | Children | Child Health                | EMR         | NO excluded cases without diagnosis code | January 1, 2016 and December 31, 2020. | Yes | Decrease               |          | No   |   | NA |
| 53 | Carré     | Impact of COVID-19 lockdown on a tertiary center pediatric otolaryngology emergency department                                                                | European Journal of Pediatrics <a href="https://doi.org/10.1007/s00431-021-04236-3">https://doi.org/10.1007/s00431-021-04236-3</a>                                                                                                                                                                                                                                                        | No  | Peer    | EURO                    | HIC       | France                                                                                               | Children | EMS                         | Hosp IS     | None                                     | March to May 2018, 2019, 2020          | No  | Mixed                  |          | None |   | NA |
| 54 | Causey    | Estimating global and regional disruptions to routine childhood vaccine coverage during the COVID-19 pandemic in 2020: a modelling study                      | Lancet 2021; 398: 522–34 Published Online July 15, 2021 <a href="https://doi.org/10.1016/S0140-6736(21)01337-4">https://doi.org/10.1016/S0140-6736(21)01337-4</a>                                                                                                                                                                                                                         | No  | Peer    | Global                  | HIC, LMIC | Global                                                                                               | Children | Immunizations               | HMIS        | None                                     | Jan-Dec 2020 comparison with expected  | Yes | Decrease with recovery |          | No   |   | NA |

|    | A              | C                                                                                                                                                           | D                                                                                                                                                                                          | E   | F    | G          | H    | I                               | J        | K            | M                | N                                                                                                                                     | O                                                                                                                                                              | P   | S                      | T          | U                               | V                                                              | Y |
|----|----------------|-------------------------------------------------------------------------------------------------------------------------------------------------------------|--------------------------------------------------------------------------------------------------------------------------------------------------------------------------------------------|-----|------|------------|------|---------------------------------|----------|--------------|------------------|---------------------------------------------------------------------------------------------------------------------------------------|----------------------------------------------------------------------------------------------------------------------------------------------------------------|-----|------------------------|------------|---------------------------------|----------------------------------------------------------------|---|
| 55 | Chandir        | Impact of COVID-19 lockdown on routine immunisation in Karachi, Pakistan                                                                                    | Lancetgh Vol 8 September 2020<br><a href="https://doi.org/10.1016/S2214-109X(20)30290-4">https://doi.org/10.1016/S2214-109X(20)30290-4</a>                                                 | No  | Peer | SEARO      | LMIC | Pakistan                        | Children | Immunization | EIR              | YES Digital systems, like the ZM EIR, are valuable in the response to disruptions to immunisation programmes created by the pandemic. | baseline (Sep 23, 2019 - Mar 22, 2020), and percentage reduction during COVID-19 lockdown (Mar 23-May 9, 2020) and post COVID-19 lockdown (May 10-Jun 6, 2020) | No  | Decrease               | Yes        | Data for targeting              | Shown partila recovery, which reduced again with next lockdown |   |
| 56 | Chandir        | Impact of COVID-19 pandemic response on uptake of routine immunizations in Sindh, Pakistan: An analysis of provincial electronic immunization registry data | Vaccine 38 (2020) 7146–7155<br><a href="https://doi.org/10.1016/j.vaccine.2020.08.019">https://doi.org/10.1016/j.vaccine.2020.08.019</a><br>0264-410X/20 Elsevier Ltd. All rights reserved | Yes | Peer | SEARO      | LMIC | Pakistan                        | Children | Immunization | EIR              | NO Discussed standard issues with EIR in general and specific to province                                                             | (September 23, 2019, to March 22, 2020) was selected and compared to COVID-19 lockdown period (March 23–May 09, 2020). Some FU till July2020                   | No  | Decrease               | Yes        | Data for targeting              | Shown partila recovery, which reduced again with next lockdown |   |
| 57 | Charnaya       | Effects of COVID-19 pandemic on pediatric kidney transplant in the United States                                                                            | Pediatric Nephrology<br><a href="https://doi.org/10.1007/s00467-020-04764-4">https://doi.org/10.1007/s00467-020-04764-4</a>                                                                | Yes | Peer | PAHO       | HIC  | USA                             | Children | Specialty    | Registry         | None                                                                                                                                  | Feb-Jun 2019 vs 2020                                                                                                                                           | No  | Decrease with recovery | None       | NA                              | NA                                                             |   |
| 58 | Chaziya        | COVID-19 in Malawi: lessons in pandemic preparedness from a tertiary children's hospital                                                                    | Arch Dis Child<br>2021;106:238–240.<br><a href="https://doi.org/10.1136/archdischild-2020-319980">doi:10.1136/archdischild-2020-319980</a>                                                 | No  | Peer | AFRO       | LMIC | Malawi                          | Children | EMS          | Hosp IS          | None                                                                                                                                  | Jan-Aug 2019 vs 2020                                                                                                                                           | No  | Decrease               | IncreaseMM | None                            | NA                                                             |   |
| 59 | Chelo          | Impact and projections of the COVID-19 epidemic on attendance and routine vaccinations at a pediatric referral hospital in Cameroon                         | Archives de Pe'diatrie 28 (2021) 441–450<br><a href="https://doi.org/10.1016/j.arcped.2021.05.006">https://doi.org/10.1016/j.arcped.2021.05.006</a><br>0929-693X/                          | Yes | Peer | AFRO       | LMIC | Cameroon                        | MCH      | MCH          | Hosp IS          | None                                                                                                                                  | January 1, 2016, to May 31, 2020.                                                                                                                              | No  | Decrease               | None       | NA                              | NA                                                             |   |
| 60 | Chimamise      | Impact of Covid-19 pandemic on obstetric fistula repair program in Zimbabwe                                                                                 | PLoS ONE 16(4): e0249398.<br><a href="https://doi.org/10.1371/journal.pone.0249398">https://doi.org/10.1371/journal.pone.0249398</a>                                                       | No  | Peer | AFRO       | LMIC | Zimbabwe                        | Maternal | Mat Health   | Registry         | None                                                                                                                                  | 2019 vs 2020                                                                                                                                                   | Yes | Decrease               | None       | NA                              | NA                                                             |   |
| 61 | Chisini        | COVID-19 pandemic impact on paediatric dentistry treatments in the Brazilian Public Health System                                                           | Int J Paediatr Dent.<br>2021;31:31–34 DOI:<br>10.1111/tpd.12741                                                                                                                            | No  | Peer | PAHO       | LMIC | Brazil                          | Children | Specialty    | Network Database | None                                                                                                                                  | January 2019 to May 2020                                                                                                                                       | No  | Decrease               | None       | NA                              | NA                                                             |   |
| 62 | Chiu           | Changes in pediatric seizure-related emergency department attendances during COVID-19 e A territory-wide observational study                                | Journal of the Formosan Medical Association 120 (2021) 1647e1651                                                                                                                           | No  | Peer | WPRO       | LMIC | China                           | Children | EMS          | Hosp IS          | None                                                                                                                                  | January 23 and April 22 in 2015e2020.                                                                                                                          | No  | Mixed                  | No         | NA                              | NA                                                             |   |
| 63 | Chong          | Impact of COVID-19 on pediatric emergencies and hospitalizations in Singapore                                                                               | BMC Pediatrics (2020) 20:562<br><a href="https://doi.org/10.1186/s12887-020-02469-z">https://doi.org/10.1186/s12887-020-02469-z</a>                                                        | No  | Peer | SEARO      | HIC  | Singapore                       | Children | EMS          | EMR/EHR          | None                                                                                                                                  | Jan-Aug 2020                                                                                                                                                   | No  | Mixed                  | None       | NA                              | NA                                                             |   |
| 64 | Connolly       | Childhood immunization during the COVID-19 pandemic: experiences in Haiti, Lesotho, Liberia and Malawi                                                      | Bull World Health Organ<br>2022;100:115–126C   doi:<br><a href="http://dx.doi.org/10.2471/BLT.21.286774">http://dx.doi.org/10.2471/BLT.21.286774</a>                                       | Yes | Peer | AFRO, PAHO | LMIC | Haiti, Lesotho, Liberia, Malawi | Children | Immunization | HMIS             | None                                                                                                                                  | March2020-Aug 2021                                                                                                                                             | Yes | Decrease with recovery | Yes        | Logistic Support and Incentives | Recovery of vaccination rates                                  |   |
| 65 | Coulbaly-Zerbo | Maintaining Essential Nutrition Services to Underfive Children in Yemen: A Programmatic Adaptation Amidst the COVID-19 Pandemic                             | Children 2021, 8, 350.<br><a href="https://doi.org/10.3390/children8050350">https://doi.org/10.3390/children8050350</a>                                                                    | No  | Peer | EMRO       | LMIC | Yemen                           | Children | Child Health | HMIS             | None                                                                                                                                  | 2018-2020                                                                                                                                                      | Yes | Increase               | IncreaseMM | No                              | NA                                                             |   |
| 66 | Courtney       | Decreases in Young Children Who Received Blood Lead Level Testing During COVID-19 — 34 Jurisdictions, January–May 2020                                      | MMWR / February 5, 2021 / Vol. 70 / No. 5                                                                                                                                                  | No  | Peer | PAHO       | HIC  | USA                             | Children | Specialty    | Surveillance     | None                                                                                                                                  | January–May 2019 and January–May 2020.                                                                                                                         | No  | Decrease               | No         | NA                              | NA                                                             |   |

|    | A                       | C                                                                                                                                                                                    | D                                                                                                                                                                                                                                                                                               | E   | F    | G    | H    | I            | J        | K             | M           | N                                                             | O                                                                                                             | P   | S                      | T        | U            | V                                               | Y |
|----|-------------------------|--------------------------------------------------------------------------------------------------------------------------------------------------------------------------------------|-------------------------------------------------------------------------------------------------------------------------------------------------------------------------------------------------------------------------------------------------------------------------------------------------|-----|------|------|------|--------------|----------|---------------|-------------|---------------------------------------------------------------|---------------------------------------------------------------------------------------------------------------|-----|------------------------|----------|--------------|-------------------------------------------------|---|
| 67 | Crockett                | Rapid Conversion from Clinic to Telehealth Behavioral Services During the COVID-19 Pandemic                                                                                          | <a href="https://doi.org/10.1007/s40617-020-00499-8">https://doi.org/10.1007/s40617-020-00499-8</a> / Published online: 15 October 2020 Behavior Analysis in Practice (2020) 13:725–735                                                                                                         | Yes | Peer | PAHO | HIC  | USA          | Children | Mental Health | HMIS        | None                                                          | Jan-June2020                                                                                                  | No  | Decrease with Recovery | Yes      | Telemedicine | Recovery of total contacts                      |   |
| 68 | Dandena                 | Impact of COVID-19 and mitigation plans on essential health services: institutional experience of a hospital in Ethiopia                                                             | BMC Health Services Research (2021) 21:1105 <a href="https://doi.org/10.1186/s12913-021-07106-8">https://doi.org/10.1186/s12913-021-07106-8</a>                                                                                                                                                 | Yes | Peer | AFRO | LMIC | Ethiopia     | MCH      | MCH           | Paper HMIS  | None                                                          | May-Oct 2019 & 2020                                                                                           | Yes | Decrease with recovery | Yes      | Multiple     | Less impact on Maternity and Emergency services |   |
| 69 | das Neves Martins Pires | Covid-19 pandemic impact on maternal and child health services access in Nampula, Mozambique: a mixed methods research                                                               | BMC Health Services Research (2021) 21:860 <a href="https://doi.org/10.1186/s12913-021-06878-3">https://doi.org/10.1186/s12913-021-06878-3</a>                                                                                                                                                  | No  | Peer | AFRO | LMIC | Mozambique   | MCH      | MCH           | HMIS        | None                                                          | March-May 2019 vs 2020                                                                                        | No  | Mixed                  | None     |              | NA                                              |   |
| 70 | Davico                  | Where have the children with epilepsy gone? An observational study of seizure-related accesses to emergency department at the time of COVID-19                                       | Seizure: European Journal of Epilepsy 83 (2020) 38–40 <a href="https://doi.org/10.1016/j.seizure.2020.09.025">https://doi.org/10.1016/j.seizure.2020.09.025</a>                                                                                                                                 | No  | Peer | EURO | HIC  | Italy        | Children | EMS           | Paper MR/HR | None                                                          | January 6, 2020 and April 21, 2020, were examined and compared with the corresponding periods of COVID-19.    | No  | Decrease               | None     |              | NA                                              |   |
| 71 | de Carvalho-Sauer       | Impact of COVID-19 pandemic on time series of maternal mortality ratio in Bahia, Brazil: analysis of period 2011–2020                                                                | BMC Pregnancy Childbirth (2021) 21:423 <a href="https://doi.org/10.1186/s12884-021-03899-y">https://doi.org/10.1186/s12884-021-03899-y</a>                                                                                                                                                      | Yes | Peer | PAHO | LMIC | Brazil       | Maternal | Mat Health    | HMIS        | YES Discuss secondary data use and possible delayed reporting | 2013-2019 vs 2020                                                                                             | Yes | IncreaseMM             | None     |              | NA                                              |   |
| 72 | De Curtis               | Increase of stillbirth and decrease of late preterm infants during the COVID-19 pandemic lockdown                                                                                    | Arch Dis Child Fetal Neonatal Ed 2021;106:F456. doi:10.1136/fetalneonatal-2020-320682                                                                                                                                                                                                           | Yes | Peer | EURO | HIC  | Italy        | Newborn  | Neonatal      | Hosp IS     | None                                                          | (March, April, May 2020 & 2019                                                                                | No  | MixedMM                | No       |              | NA                                              |   |
| 73 | de Oliveira             | Repercussions of the COVID-19 pandemic on preventive health services in Brazil                                                                                                       | Preventive Medicine 155 (2022) 106914                                                                                                                                                                                                                                                           | No  | Peer | PAHO | LMIC | Brazil       | Children | Immunizations | HMIS        | None                                                          | March-Dec 2017-2020                                                                                           | Yes | Decrease               | No       |              | NA                                              |   |
| 74 | Delaroche               | Pediatric Emergency Department Visits at US Children's Hospitals During the COVID-19 Pandemic                                                                                        | PEDIATRICS Volume 147, number 4, April 2021:e2020039628 ARTICLE Downloaded from <a href="http://publications.aap.org/pediatrics/article-pdf/147/4/e2020039628/1182017/peds_2020039628.pdf">http://publications.aap.org/pediatrics/article-pdf/147/4/e2020039628/1182017/peds_2020039628.pdf</a> | No  | Peer | PAHO | HIC  | USA          | Children | EMS           | Hosp IS     | None                                                          | March 15 to August 31, 2017–2020                                                                              | No  | Decrease               | No       |              | NA                                              |   |
| 75 | DeSilva                 | Association of the COVID-19 Pandemic With Routine Childhood Vaccination Rates and Proportion Up to Date With Vaccinations Across 8 US Health Systems in the Vaccine Safety Datalink  | JAMA Pediatr. 2022;176(1):68-77. doi:10.1001/jamapediatrics.2021.4251                                                                                                                                                                                                                           | Yes | Peer | PAHO | HIC  | USA          | Children | Immunization  | EIR         | None                                                          | Jan-Oct 2019-2020                                                                                             | Yes | Decrease               | No       |              | NA                                              |   |
| 76 | Desti                   | Impacts of COVID-19 on essential health services in Tigray, Northern Ethiopia: A prepost study                                                                                       | PLoS ONE 16(8): e0256330. <a href="https://doi.org/10.1371/journal.pone.0256330">https://doi.org/10.1371/journal.pone.0256330</a>                                                                                                                                                               | Yes | Peer | AFRO | LMIC | Ethiopia     | MCH      | MCH           | HMIS        | NO Discussed Reporting quality generally                      | second quarter of 2020 (Post COVID19) compared to similar quarter in 2019 (Pre COVID-19) (3 months period). T | No  | Mixed                  | None     |              | NA                                              |   |
| 77 | Dong                    | Routine childhood vaccination rates in an academic family health team before and during the first wave of the COVID-19 pandemic: a pre-post analysis of a retrospective chart review | CMAJ Open 2022 January 25. DOI:10.9778/cmajo.20210084                                                                                                                                                                                                                                           | No  | Peer | PAHO | HIC  | Canada       | Children | Immunization  | EMR         | None                                                          | Jan. 1, 2018, and Aug. 31, 2020                                                                               | No  | Decrease               | No       |              | NA                                              |   |
| 78 | Dopfer                  | COVID-19 related reduction in pediatric emergency healthcare utilization – a concerning trend                                                                                        | BMC Pediatrics (2020) 20:427 <a href="https://doi.org/10.1186/s12887-020-02303-6">https://doi.org/10.1186/s12887-020-02303-6</a>                                                                                                                                                                | No  | Peer | EURO | HIC  | Germany      | Children | EMS           | EMR/EHR     | None                                                          | Jan-Apr 2019 vs 2020                                                                                          | No  | Decrease               | StableMM | None         | NA                                              |   |
| 79 | Dorward                 | The impact of the COVID-19 lockdown on HIV care in 65 South African primary care clinics: an interrupted time series analysis                                                        | Lancet HIV 2021; 8: e158–65 Published Online February 4, 2021 <a href="https://doi.org/10.1016/S2352-3018(20)30359-3">https://doi.org/10.1016/S2352-3018(20)30359-3</a>                                                                                                                         | Yes | Peer | AFRO | LMIC | South Africa | Children | HIV/TB        | HMIS        | None                                                          | Jan 1, 2018, to July 31, 2020                                                                                 | No  | Decrease with recovery | None     |              | NA                                              |   |

|    | A             | C                                                                                                                                                                                                                             | D                                                                                                                                                              | E   | F    | G     | H    | I         | J        | K          | M             | N                                                                                                                                                                                                                              | O                                                                                                       | P                 | S                             | T                      | U    | V                            | Y                                                                                                                                                                                                                                                       |
|----|---------------|-------------------------------------------------------------------------------------------------------------------------------------------------------------------------------------------------------------------------------|----------------------------------------------------------------------------------------------------------------------------------------------------------------|-----|------|-------|------|-----------|----------|------------|---------------|--------------------------------------------------------------------------------------------------------------------------------------------------------------------------------------------------------------------------------|---------------------------------------------------------------------------------------------------------|-------------------|-------------------------------|------------------------|------|------------------------------|---------------------------------------------------------------------------------------------------------------------------------------------------------------------------------------------------------------------------------------------------------|
| 80 | Doubova       | Overcoming disruptions in essential health services during the COVID-19 pandemic in Mexico                                                                                                                                    | BMJ Global Health 2022;7:e008099. doi:10.1136/bmjgh-2021-008099                                                                                                | Yes | Peer | PAHO  | LMIC | Mexico    | MCH      | MCH        | HMIS          | None                                                                                                                                                                                                                           | January 2019 to August 2021.                                                                            | Yes               | Decrease with slight recovery |                        | Yes  | Multiple                     | recovery but not to prepandemic                                                                                                                                                                                                                         |
| 81 | Doubova       | Disruption in essential health services in Mexico during COVID-19: an interrupted time series analysis of health information system data                                                                                      | BMJ Global Health 2021;6:e006204. doi:10.1136/bmjgh-2021-006204                                                                                                | No  | Peer | PAHO  | LMIC | Mexico    | MCH      | MCH        | HMIS          | YES Discussed routine DQA in methods and noted in discussion "The pandemic may have affected reporting quality of the data. However, the health information division did not report changes in data completeness and quality." | for January 2019 to December 2020                                                                       | Yes               | Decrease                      |                        | None |                              | NA                                                                                                                                                                                                                                                      |
| 82 | Du            | Association between the COVID-19 pandemic and the risk for adverse pregnancy outcomes: a cohort study                                                                                                                         | BMJ Open 2021;11:e047900. doi:10.1136/bmjopen-2020-047900                                                                                                      | Yes | Peer | WPRO  | LMIC | China     | MNH      | MNH        | Hosp IS       | None                                                                                                                                                                                                                           | Jan-Dec 2019 vs Jan-Jul2020                                                                             | No                |                               | IncreaseMM             | None |                              | NA                                                                                                                                                                                                                                                      |
| 83 | Dvir,         | Comparison of Use of the Massachusetts Child Psychiatry Access Program and Patient Characteristics Before vs During the COVID-19 Pandemic                                                                                     | JAMA Network Open. 2022;5(2):e2146618. doi:10.1001/jamanetworkopen.2021.46618 (Repr)                                                                           | Yes | Peer | PAHO  | HIC  | USA       | Children |            | Mental Health | HMIS                                                                                                                                                                                                                           | None                                                                                                    | 2019 through 2021 | Yes                           | Decrease with recovery |      | No                           | NA                                                                                                                                                                                                                                                      |
| 84 | Elalouf       | Pediatric Dental Emergency Visits and Treatment during Lockdown in the COVID-19 Pandemic: A Retrospective Study                                                                                                               | Int. J. Environ. Res. Public Health 2022, 19, 3774. https://doi.org/10.3390/ijerph19073774                                                                     | No  | Peer | EMRO  | HIC  | Israel    | Children | EMS        | Hosp IS       | None                                                                                                                                                                                                                           | (2019 and 2020) between 19 March and 30 April and after the lockdown period from 1 May to 12 June 2020. | No                | Mixed                         |                        | Yes  | PPE, Telemedicine, Screening | adjusted rapidly to pandemic situation                                                                                                                                                                                                                  |
| 85 | Emmanuel      | Indirect effects of COVID-19 pandemic on reproductive, maternal, newborn and child health services in Pakistan                                                                                                                | EMHJ – Vol. 28 No. 4 – 2022                                                                                                                                    | Yes | Peer | SEARO | LMIC | Pakistan  | MCH      | MCH        | Hosp IS       | None                                                                                                                                                                                                                           | May-Dec 2019-2020                                                                                       | Yes               | Decrease with Recovery        |                        | No   |                              | NA                                                                                                                                                                                                                                                      |
| 86 | Enbiale,      | Effect of the COVID-19 Pandemic Preparation and Response on Essential Health Services in Primary and Tertiary Healthcare Settings of Amhara Region, Ethiopia                                                                  | Am. J. Trop. Med. Hyg., 105(5), 2021, pp. 1240–1246 doi:10.4269/ajtmh.21-0354                                                                                  | Yes | Peer | AFRO  | LMIC | Ethiopia  | MCH      | MCH        | Paper MR/HR   | None                                                                                                                                                                                                                           | July 7, 2019 to July 6, 2020                                                                            | No                | Decrease with recovery        |                        | Yes  | Info Campaign & Policy       | We think that the reasons for the sustained and recovery of the essential health service are two factors. Firstly, the swift response by the MOH and regional health bureaus and secondly, the slow progression of the pandemic which never overwhelmed |
| 87 | Erdmann       | Impact of the COVID-19 pandemic on incidence, time of diagnosis and delivery of healthcare among paediatric oncology patients in Germany in 2020: Evidence from the German Childhood Cancer Registry and a qualitative survey | The Lancet Regional Health - Europe (2021), https://doi.org/10.1016/j.lanepe.2021.100188                                                                       | No  | Peer | Euro  | HIC  | Germany   | Children | Specialty  | Registry      | None                                                                                                                                                                                                                           | 2015-2019 vs 2020                                                                                       | Yes               | Mixed                         |                        | None |                              | NA                                                                                                                                                                                                                                                      |
| 88 | Ferrero       | Impact of the COVID-19 pandemic in the paediatric emergency department attendances in Argentina                                                                                                                               | Arch Dis Child 2021;106:e5.                                                                                                                                    | Yes | Peer | PAHO  | LMIC | Argentina | Children | EMS        | Hosp IS       | None                                                                                                                                                                                                                           | January to May) of 2019 and 2020                                                                        | No                | Decrease                      |                        | No   |                              | NA                                                                                                                                                                                                                                                      |
| 89 | Fidanci       | The impact of the COVID-19 pandemic on paediatric emergency service                                                                                                                                                           | Int J Clin Pract. 2021;75:e14398. wileyonlinelibrary.com/journal/ijcp   1 of 7 https://doi.org/10.1111/ijcp.14398                                              | No  | Peer | EURO  | HIC  | Turkey    | Children | EMS        | EMR           | None                                                                                                                                                                                                                           | 2019 and 2020 from the months of April to October                                                       | Yes               | Decrease                      | IncreaseMM             | No   |                              | NA                                                                                                                                                                                                                                                      |
| 90 | Fitriani-grum | Health Impact Assessment of Covid-19 Towards Maternal Health Care in West Jakarta                                                                                                                                             | Journal of Maternal and Child Health (2021), 06(02): 229-237; http://ojs.mchm.com/index.php?journal=thejmch&page=article&op=view&path%5B%5D=557&path%5B%5D=pdf | No  | Peer | SEARO | LMIC | Indonesia | Maternal | Mat Health | HMIS          | None                                                                                                                                                                                                                           | January 2018-May2020                                                                                    | No                | Decrease with recovery        |                        | None |                              | NA                                                                                                                                                                                                                                                      |



|     | A              | C                                                                                                                                                                  | D                                                                                                                                                                                          | E   | F    | G     | H    | I        | J        | K             | M             | N               | O                                                                                                                                                                     | P   | S                      | T          | U    | V | Y  |
|-----|----------------|--------------------------------------------------------------------------------------------------------------------------------------------------------------------|--------------------------------------------------------------------------------------------------------------------------------------------------------------------------------------------|-----|------|-------|------|----------|----------|---------------|---------------|-----------------|-----------------------------------------------------------------------------------------------------------------------------------------------------------------------|-----|------------------------|------------|------|---|----|
| 91  | Franzolin      | Pediatric eye emergency department activity during the first wave of Covid-19 pandemic                                                                             | Italian Journal of Pediatrics (2021) 47:217<br><a href="https://doi.org/10.1186/s13052-021-01167-5">https://doi.org/10.1186/s13052-021-01167-5</a>                                         | No  | Peer | EURO  | HIC  | Italy    | Children | EMS           | EMR           | None            | March to May 2017-2020                                                                                                                                                | No  | Decrease               |            | No   |   | NA |
| 92  | Garstang       | Effect of COVID-19 lockdown on child protection medical assessments: a retrospective observational study in Birmingham, UK                                         | BMJ Open 2020;10:e042867.<br>doi:10.1136/bmjopen-2020-042867                                                                                                                               | Yes | Peer | EURO  | HIC  | UK       | Children | Child Abuse   | Paper MR/HR   | None            | 18-week period from late February to late June during the years 2018–2020.                                                                                            | No  | Decrease               |            | None |   | NA |
| 93  | Gebregeziabher | Assessment of maternal and child health care services performance in the context of COVID-19 pandemic in Addis Ababa, Ethiopia: evidence from routine service data | Reproductive Health (2022) 19:42<br><a href="https://doi.org/10.1186/s12978-022-01353-6">https://doi.org/10.1186/s12978-022-01353-6</a>                                                    | No  | Peer | AFRO  | LMIC | Ethiopia | MCH      | MCH           | HMIS          | NO Routine only | July 2019 to March 2021                                                                                                                                               | Yes | Decrease with recovery |            | No   |   | NA |
| 94  | Gerall         | Delayed presentation and sub-optimal outcomes of pediatric patients with acute appendicitis during the COVID-19 pandemic                                           | Journal of Pediatric Surgery 56 (2021) 905–910                                                                                                                                             | No  | Peer | PAHO  | HIC  | USA      | Children | EMS           | EMR           | None            | March to May 2019-2020                                                                                                                                                | No  |                        | IncreaseMM | No   |   | NA |
| 95  | Gill           | Reasons for Admissions to US Children's Hospitals During the COVID-19 Pandemic                                                                                     | JAMA April 27, 2021 Volume 325, Number 16 (                                                                                                                                                | No  | Peer | PAHO  | HIC  | USA      | Children | EMS           | Hosp IS       | None            | March-Aug 2017-2020                                                                                                                                                   | No  | Decrease               |            | No   |   | NA |
| 96  | Glazier        | Shifts in office and virtual primary care during the early COVID-19 pandemic in Ontario, Canada                                                                    | CMAJ 2021 February 8;193:E200-10. doi: 10.1503/cmaj.202303                                                                                                                                 | No  | Peer | PAHO  | HIC  | Canada   | Children | Child Health  | Admin/Billing | None            | Jan. 1 to July 28, 2020, with the same period in 2019                                                                                                                 | No  | Mixed                  |            | None |   | NA |
| 97  | Golandaj       | Pediatric TB detection in the era of COVID-19                                                                                                                      | Indian Journal of Tuberculosis, <a href="https://doi.org/10.1016/j.ijt.2021.04.015">https://doi.org/10.1016/j.ijt.2021.04.015</a>                                                          | Yes | Peer | SEARO | LMIC | India    | Children | HIV/TB        | HMIS          | None            | January to September for the year 2020 were compared to 2019                                                                                                          | Yes | Decrease               |            | None |   | NA |
| 98  | Gomez et.al.   | A population-based analysis of the impact of the COVID-19 pandemic on common abdominal and gynecological emergency department visits                               | CMAJ 2021 May 25;193:E753-60. doi: 10.1503/cmaj.202821                                                                                                                                     | No  | Peer | PAHO  | HIC  | Canada   | Maternal | EMS           | EMS IS        | None            | Jan. 1, 2019–July 1, 2019, and Jan. 1, 2020–June 30, 2020.                                                                                                            | No  | Decrease               |            | None |   | NA |
| 99  | Güemes         | Severity in pediatric type 1 diabetes mellitus debut during the COVID-19 pandemic                                                                                  | J Pediatr Endocrinol Metab 2020; 33(12): 1601–1603                                                                                                                                         | Yes | Peer | EURO  | HIC  | Spain    | Children | Specialty     | Hosp IS       | None            | March 21st and May 6th 2020, 2018, 2019                                                                                                                               | No  |                        | IncreaseMM | No   |   | NA |
| 100 | Guroi-Urganci  | Obstetric interventions and pregnancy outcomes during the COVID-19 pandemic in England: A nationwide cohort study                                                  | PLoS Med19(1): e1003884. <a href="https://doi.org/10.1371/journal.pmed.1003884">https://doi.org/10.1371/journal.pmed.1003884</a>                                                           | Yes | Peer | EURO  | HIC  | UK       | MNH      | MNH           | Hosp IS       | None            | 23 March 2020 to 22 February 2021) and the pre-pandemic period (the corresponding calendar period 1 year earlier: 23 March 2019 to 22 February 2020                   | Yes | Mixed                  | StableMM   | No   |   | NA |
| 101 | HA Taner       | How did the COVID-19 pandemic affect child and adolescent psychiatry outpatient clinic admissions? A single-center, retrospective study                            | Clinical Child Psychology and Psychiatry Volume 27, Issue 3, July 2022, Pages 824-835<br><a href="https://doi.org/10.1177/13591045221095657">https://doi.org/10.1177/13591045221095657</a> | No  | Peer | EURO  | HIC  | Turkey   | Children | Mental Health | EMR           | None            | March 2019 to March 2020 (pre-pandemic) and from March 2020 to March 2021                                                                                             | Yes | Mixed                  |            | No   |   | NA |
| 102 | Haddadin       | Changes in Pediatric Emergency Department Visits During the COVID-19 Pandemic                                                                                      | HOSPITAL PEDIATRICS Volume 11, Issue 4, April 2021<br>DOI: <a href="https://doi.org/10.1542/hpeds.2020-005074">https://doi.org/10.1542/hpeds.2020-005074</a>                               | No  | Peer | PAHO  | HIC  | USA      | Children | EMS           | Hosp IS       | None            | 2018, 2019, 2020                                                                                                                                                      | Yes | Mixed                  |            | None |   | NA |
| 103 | Hadley et.al.  | EMS activations by pregnant patients in Maryland (USA) during the COVID-19 pandemic.                                                                               | Prehosp Disaster Med. 2021;00(00):1–6.                                                                                                                                                     | No  | Peer | PAHO  | HIC  | USA      | Maternal | EMS           | EMS IS        | None            | pandemic period (March 10, 2020 through July 20, 2020) to the pre-pandemic period during the same time frame in the prior year (March 10, 2019 through July 20, 2019) | No  | Decrease               | StableMM   | None |   | NA |

|     | A         | C                                                                                                                                                                               | D                                                                                       | E   | F    | G     | H    | I                                                                                                         | J        | K               | M             | N                                                                                            | O                                                                                                                                                                                                                                                                                                                       | P   | S                      | T          | U    | V                       | Y                                                                                                           |
|-----|-----------|---------------------------------------------------------------------------------------------------------------------------------------------------------------------------------|-----------------------------------------------------------------------------------------|-----|------|-------|------|-----------------------------------------------------------------------------------------------------------|----------|-----------------|---------------|----------------------------------------------------------------------------------------------|-------------------------------------------------------------------------------------------------------------------------------------------------------------------------------------------------------------------------------------------------------------------------------------------------------------------------|-----|------------------------|------------|------|-------------------------|-------------------------------------------------------------------------------------------------------------|
| 104 | Handley   | Changes in Preterm Birth Phenotypes and Stillbirth at 2 Philadelphia Hospitals During the SARS-CoV-2 Pandemic, March-June 2020                                                  | JAMA January 5, 2021 Volume 325, Number 1 87                                            | No  | Peer | PAHO  | HIC  | USA                                                                                                       | Newborn  | Neonatal        | Surveillance  | None                                                                                         | March through June of 2018, 2019, and 2020                                                                                                                                                                                                                                                                              | No  |                        | StableMM   | No   |                         | NA                                                                                                          |
| 105 | Hans      | Impact of Pandemic on Women Health Indicators in a Tertiary Health Centre of Bihar                                                                                              | J Evolution Med Dent Sci 2021;10(2):1639-1644, DOI: 10.14260/jemds/2021/341             | Yes | Peer | SEARO | LMIC | India                                                                                                     | MNH      | MNH             | Paper MR/HR   | None                                                                                         | April 2019 to September 2019, total of 20,961 were in "pre Covid-19" control group, while patients seen from April 2020 to September 2020,                                                                                                                                                                              | Yes | Decrease               | IncreaseMM | No   |                         | NA                                                                                                          |
| 106 | Haqqi     | COVID-19 in Pakistan: Impact on global polio eradication initiative                                                                                                             | J Med Virol. 2021;93:141-143.                                                           | Yes | Peer | SEARO | LMIC | Pakistan                                                                                                  | Children | Immunizations   | HMIS          | None                                                                                         | 2014-June2020                                                                                                                                                                                                                                                                                                           | No  |                        | IncreaseMM | No   |                         | NA                                                                                                          |
| 107 | Harris    | Effects of the Coronavirus Disease 2019 Pandemic on Human Immunodeficiency Virus Services: Findings from 11 Sub-Saharan African Countries                                       | CID 2022 https://doi.org/10.1093/cid/ciab951                                            | Yes | Peer | AFRO  | LMIC | Angola, DRC, Eswatini, Ethiopia, Kenya, South Sudan, Burundi, Cameroon, Cote d'Ivoire, Mozambique, Zambia | Maternal | HIV/TB          | HMIS          | None                                                                                         | Q1 (October 2019–December 2019) and Q2 (January 2020–March 2020) data reflecting HIV service delivery provision before the implementation of any COVID-19–related restrictions. Q3 (April 2020–June 2020) data reflected HIV service delivery during the time period of restrictions, and Q4 (July 2020–September 2020) | Yes | Decrease with recovery |            | No   |                         | NA                                                                                                          |
| 108 | Hartford  | Pediatric Emergency Department Responses to COVID-19: Transitioning From Surge Preparation to Regional Support                                                                  | Disaster Medicine and Public Health PreparednessVOL. 15/NO. 1DOI: 10.1017/dmp.2020.197  | Yes | Peer | PAHO  | HIC  | USA                                                                                                       | Children | EMS             | Hosp IS       | None                                                                                         | Dec2019-Apr2020                                                                                                                                                                                                                                                                                                         | No  | Decrease               |            | No   |                         | NA                                                                                                          |
| 109 | Hategeka  | Impact of the COVID-19 pandemic and response on the utilisation of health services in public facilities during the first wave in Kinshasa, the Democratic Republic of the Congo | BMJ Global Health 2021;6:e005955. doi:10.1136/bmjgh-2021-005955                         | No  | Peer | AFRO  | LMIC | DRC                                                                                                       | MCH      | MCH             | HMIS          | YES Discussed regular DQA activities, note substantial missing data but not related to COVID | pre-COVID-19 period (January 2018 to February 2020) and the COVID-19 period (March to December 2020).                                                                                                                                                                                                                   | Yes | Mixed                  |            | None |                         | NA                                                                                                          |
| 110 | Hedermann | Danish premature birth rates during the COVID-19 lockdown                                                                                                                       | Arch Dis Child Fetal Neonatal Ed 2021;106:F93–F95. doi:10.1136/archdischild-2020-319990 | No  | Peer | EURO  | HIC  | Denmark                                                                                                   | Newborn  | Neonatal        | Surveillance  | None                                                                                         | (12 March–14 April 2020) and in the previous 5 years (2015–2019)                                                                                                                                                                                                                                                        | No  |                        | DecreaseMM | No   |                         | NA                                                                                                          |
| 111 | Hedstrom  | Impact of the early COVID-19 pandemic on outcomes in arural Ugandan neonatal unit: Aretrospective cohort study                                                                  | PLoS ONE16(12): e0260006. https://doi.org/10.1371/journal.pone.0260006                  | Yes | Peer | AFRO  | LMIC | Uganda                                                                                                    | Newborn  | Neonatal        | Hosp IS       | None                                                                                         | (September 2019 toMarch 2020) and during the early COVID-19 period (April–September 2020)                                                                                                                                                                                                                               | Yes |                        | IncreaseMM | No   |                         | NA                                                                                                          |
| 112 | Hekimoglu | Effects of COVID-19 pandemic period on neonatal mortality and morbidity                                                                                                         | Pediatrics and Neonatology 63 (2022) 78e83                                              | Yes | Peer | EURO  | HIC  | Turkey                                                                                                    | Newborn  | Neonatal        | Paper MR/HR   | None                                                                                         | 1 March and 30 May 2020 & 2019                                                                                                                                                                                                                                                                                          | No  | Decrease               | MixedMM    | No   |                         | NA                                                                                                          |
| 113 | Howarth   | Trends in healthcare utilisation during COVID-19: a longitudinal study from the UK                                                                                              | BMJ Open 2021;11:e048151. doi:10.1136/bmjopen-2020-048151                               | Yes | Peer | EURO  | HIC  | Turkey                                                                                                    | Maternal | Maternal Health | Admin/Billing | None                                                                                         | January 2018 to August 2020                                                                                                                                                                                                                                                                                             | No  | Stable                 |            | No   |                         | NA                                                                                                          |
| 114 | Hui       | Effect of COVID-19 on delivery plans and postnatal depression scores of pregnant women                                                                                          | Hong Kong Med J 2020;26:113–7 https://doi.org/10.12809/hkmj208774                       | No  | Peer | WPRO  | LMIC | China (Hong Kong)                                                                                         | Maternal | Mental Health   | Hosp IS       | None                                                                                         | pre-alert period (1 Jan 2019 to 4 Jan 2020) and the post-alert period (5 Jan 2020 to 30 Apr 2020).                                                                                                                                                                                                                      | No  | Mixed                  |            | None |                         | NA                                                                                                          |
| 115 | Hull      | The impact of the COVID-19 pandemic on routine vaccinations in Victoria                                                                                                         | MJA 215 (2) • 19 July 2021                                                              | Yes | Peer | WPRO  | HIC  | Australia                                                                                                 | Children | Immunization    | EIR           | None                                                                                         | Jan 2019-Oct2020                                                                                                                                                                                                                                                                                                        | Yes | Stable                 |            | Yes  | Change Service Platform | HPV dose 1 vaccination of adolescents declined noticeably during the first but not the second epidemic wave |
| 116 | Hurst     | Reduced pediatric urgent asthma utilization and exacerbations during the COVID-19 pandemic                                                                                      | Pediatric Pulmonology. 2021;56:3166–3173.                                               | No  | Peer | PAHO  | HIC  | USA                                                                                                       | Children | Specialty       | EMR           | None                                                                                         | March 1, 2019 through February 28, 2021                                                                                                                                                                                                                                                                                 | Yes |                        | DecreaseMM | No   |                         | NA                                                                                                          |

|     | A                  | C                                                                                                                                                             | D                                                                                                                                              | E   | F       | G     | H    | I            | J        | K             | M                | N                                                                                                                                                                                                                                                                                                                                                                                                                                                                                                                                                                                                 | O                                                                                  | P   | S                             | T          | U    | V                       | Y                                                                                                                                                                                                                                                                                                                                                                                |
|-----|--------------------|---------------------------------------------------------------------------------------------------------------------------------------------------------------|------------------------------------------------------------------------------------------------------------------------------------------------|-----|---------|-------|------|--------------|----------|---------------|------------------|---------------------------------------------------------------------------------------------------------------------------------------------------------------------------------------------------------------------------------------------------------------------------------------------------------------------------------------------------------------------------------------------------------------------------------------------------------------------------------------------------------------------------------------------------------------------------------------------------|------------------------------------------------------------------------------------|-----|-------------------------------|------------|------|-------------------------|----------------------------------------------------------------------------------------------------------------------------------------------------------------------------------------------------------------------------------------------------------------------------------------------------------------------------------------------------------------------------------|
| 117 | J Grudzis-Sekowska | Healthcare Utilization and Adherence to Treatment Recommendations among Children with Type 1 Diabetes in Poland during the COVID-19 Pandemic                  | J. Environ. Res. Public Health 2022, 19, 4798. <a href="https://doi.org/10.3390/ijerph19084798">https://doi.org/10.3390/ijerph19084798</a>     | No  | Peer    | EURO  | HIC  | Poland       | Children | Specialty     | Admin/Billing    | None                                                                                                                                                                                                                                                                                                                                                                                                                                                                                                                                                                                              | 2016–2020                                                                          | Yes | Decrease                      | IncreaseMM | No   |                         | NA                                                                                                                                                                                                                                                                                                                                                                               |
| 118 | Jenner             | Kids are back in town: the return of high demand for paediatric emergency care                                                                                | Arch Dis Child 2021;0:1. doi:10.1136/archdischild-2021-322298                                                                                  | Yes | Peer    | EURO  | HIC  | UK           | Children | EMS           | Hosp IS          | None                                                                                                                                                                                                                                                                                                                                                                                                                                                                                                                                                                                              | April 2020–May 2021 vs 2019-2020                                                   | Yes | Decrease with recovery        |            | No   |                         | NA                                                                                                                                                                                                                                                                                                                                                                               |
| 119 | Jensen             | Child health services during a COVID-19 outbreak in KwaZulu-Natal Province, South Africa                                                                      | S Afr Med J 2021;111(2):114-119. <a href="https://doi.org/10.7196/SA MJ.2021.v111i2.15243">https://doi.org/10.7196/SA MJ.2021.v111i2.15243</a> | Yes | Peer    | AFRO  | LMIC | South Africa | MCH      | MCH           | Hosp IS          | None                                                                                                                                                                                                                                                                                                                                                                                                                                                                                                                                                                                              | January 2018 - June 2020                                                           | No  | Mixed                         | IncreaseMM | Yes  | Info Campaign           | Immun rates increased                                                                                                                                                                                                                                                                                                                                                            |
| 120 | Jensen             | The feasibility and ongoing use of electronic decision support to strengthen the implementation of IMCI in KwaZulu-Natal, South Africa                        | BMC Pediatrics (2022) 22:80 <a href="https://doi.org/10.1186/s12887-022-03147-y">https://doi.org/10.1186/s12887-022-03147-y</a>                | Yes | Peer    | AFRO  | LMIC | South Africa | Children | Child Health  | EMR              | None                                                                                                                                                                                                                                                                                                                                                                                                                                                                                                                                                                                              | December 2019 – January 2021                                                       | Yes | Decrease                      |            | Yes  | Telemedicine            | NA                                                                                                                                                                                                                                                                                                                                                                               |
| 121 | Jensen             | Child health services during a COVID-19 outbreak in KwaZulu-Natal Province, South Africa                                                                      | S Afr Med J 2021;111(2):114-119. <a href="https://doi.org/10.7196/SA MJ.2021.v111i2.15243">https://doi.org/10.7196/SA MJ.2021.v111i2.15243</a> | Yes | Peer    | AFRO  | LMIC | South Africa | Children | Child Health  | HMIS             | YES Data Outliers were identified, and numbers were verified and corrected with district information officers. potential inaccuracies in the DHIS data set. The routine DHIS data collection and capturing process involves multiple manual and electronic steps, leaving room for human error. Several levels of data verification are meant to mitigate the risk of inaccuracy,[26] but such routines may have been conducted less regularly during the COVID-19 outbreak.                                                                                                                      | January 2018 - June 2020                                                           | No  | Decrease                      | IncreaseMM | None |                         | NA                                                                                                                                                                                                                                                                                                                                                                               |
| 122 | Ji                 | Impact of the COVID-19 pandemic on routine immunization coverage in children under 2 years old in Ontario, Canada: A retrospective cohort study               | <a href="https://doi.org/10.1101/2021.10.28.21265578">https://doi.org/10.1101/2021.10.28.21265578</a>                                          | Yes | Pre-pub | PAHO  | HIC  | Canada       | Children | Immunizations | EMR              | None                                                                                                                                                                                                                                                                                                                                                                                                                                                                                                                                                                                              | January 2019-March 2020 (T1); March-July 2020 (T2); and August-December 2020 (T3). | Yes | Decrease with slight recovery |            | No   |                         | NA                                                                                                                                                                                                                                                                                                                                                                               |
| 123 | Jiang              | Equal Access to Telemedicine during COVID-19 Pandemic: A Pediatric Otolaryngology Perspective                                                                 | Laryngoscope, 00:1–5, 2020 DOI: 10.1002/lary.29164                                                                                             | No  | Peer    | PAHO  | HIC  | USA          | Children | Specialty     | EMR/EHR & Census | None                                                                                                                                                                                                                                                                                                                                                                                                                                                                                                                                                                                              | 6-week period between March and May 2020 compared to same period in 2019           | No  | Stable                        |            | Yes  | Telemedicine            | Stable outcomes; Were able to completely change to telemedicine during lockdown;                                                                                                                                                                                                                                                                                                 |
| 124 | Jiarong Pan        | Impact of the COVID-19 pandemic on infectious disease hospitalizations of neonates at a tertiary academic hospital: a cross-sectional study                   | BMC Infectious Diseases (2022) 22:206 <a href="https://doi.org/10.1186/s12879-022-07211-x">https://doi.org/10.1186/s12879-022-07211-x</a>      | No  | Peer    | WPRO  | LMIC | China        | Newborn  | Neonatal      | Hosp IS          | None                                                                                                                                                                                                                                                                                                                                                                                                                                                                                                                                                                                              | January 2015 to December 2020                                                      | Yes | Decrease                      |            | No   |                         | NA                                                                                                                                                                                                                                                                                                                                                                               |
| 125 | Jiee               | Polio Supplementary Immunization Activities During COVID-19 Pandemic: Experience from Penampang District, Sabah, Malaysia                                     | Journal of Primary Care & Community Health Volume 12: 1–9 DOI: 10.1177/2150132721102980                                                        | Yes | Peer    | SEARO | LMIC | Malasia      | Children | Immunization  | HMIS             | None                                                                                                                                                                                                                                                                                                                                                                                                                                                                                                                                                                                              | Jan 2020 to Jan 2021                                                               | Yes | Stable                        |            | Yes  | Change Service Platform | 90% coverage of intended SIA                                                                                                                                                                                                                                                                                                                                                     |
| 126 | Jones              | Population birth outcomes in 2020 and experiences of expectant mothers during the COVID-19 pandemic: a 'Born in Wales' mixed methods study using routine data | medRxiv preprint doi: <a href="https://doi.org/10.1101/2021.08.23.21262209">https://doi.org/10.1101/2021.08.23.21262209</a> ; t                | Yes | Pre-pub | EURO  | HIC  | UK           | MCH      | MCH           | EMR/EHR          | None                                                                                                                                                                                                                                                                                                                                                                                                                                                                                                                                                                                              | infants born in 2020 compared to 2016- 2019                                        | Yes | Mixed                         |            | None |                         | NA                                                                                                                                                                                                                                                                                                                                                                               |
| 127 | K Schweiberger     | Trends in Pediatric Primary Care Visits During the Coronavirus Disease of 2019 Pandemic                                                                       | academic ped Volume 21, Number 8 November–December 2021                                                                                        | No  | Peer    | PAHO  | HIC  | USA          | Children | Child Health  | Admin/Billing    | YES Due to potential lag in claims data, we tested the completeness of claims by calculating weekly rates of childbirths per 1000 female enrollees between 15 and 44 years old and confirmed that the weekly rate of childbirth in the data remained stable from January 1 through October 6, 2020.14,15 To evaluate whether the substantial rise in unemployment during the pandemic was associated with increased insurance drop-out rates during 2020 compared to prior years, we examined insurance drop-out rates across the 3 years and found the drop-out rate was similar for each year.T | January–October 2018 and 2019, 2020                                                | Yes | Decrease with Recovery        | DecreaseMM | Yes  | Multiple                | clinics worked to institute a range of strategies to support physical distancing in the office (eg, restricting the number of appointments, utilizing telemedicine visits, limiting types of conditions seen, maintaining adequate supply of personal protective equipment)17,34–36 which may contribute to the increased visit rates during the later pandemic period studied.T |

|     | A           | C                                                                                                                                                                                                                                  | D                                                                                                                                                                        | E   | F       | G                            | H         | I                                                                                                         | J        | K            | M                           | N       | O                                                                                                                 | P                                    | S        | T                      | U          | V            | Y                                       |    |
|-----|-------------|------------------------------------------------------------------------------------------------------------------------------------------------------------------------------------------------------------------------------------|--------------------------------------------------------------------------------------------------------------------------------------------------------------------------|-----|---------|------------------------------|-----------|-----------------------------------------------------------------------------------------------------------|----------|--------------|-----------------------------|---------|-------------------------------------------------------------------------------------------------------------------|--------------------------------------|----------|------------------------|------------|--------------|-----------------------------------------|----|
| 128 | Kasonia     | The impact of the COVID-19 pandemic on the provision & utilisation of primary health care 1 services in Goma, Democratic Republic of the Congo, Kambia district, Sierra Leone & Masaka 2 district, Uganda                          | <a href="https://www.medrxiv.org/content/10.1101/2022.04.28.22274416v1">https://www.medrxiv.org/content/10.1101/2022.04.28.22274416v1</a>                                | Yes | Pre-pub | AFRO                         | LMIC      | DRC, Sierra Leone, Uganda                                                                                 | MCH      | MCH          | Paper HMIS                  | None    | 1st January 2018 to the 27th December 2020.                                                                       | Yes                                  | Mixed    |                        | Yes        | Multiple     | recovery for most variables.            |    |
| 129 | Kassie      | Impact of Coronavirus Diseases-2019 (COVID-19) on Utilization and Outcome of Reproductive, Maternal, and Newborn Health Services at Governmental Health Facilities in South West Ethiopia, 2020: Comparative Cross-Sectional Study | International Journal of Women's Health 2021:13 479-488                                                                                                                  | No  | Peer    | AFRO                         | LMIC      | Ethiopia                                                                                                  | MNH      | MNH          | Paper MR/HR                 | None    | March-June 2019 and March-June 2020                                                                               | No                                   | Mixed    | IncreaseMM             | None       |              | NA                                      |    |
| 130 | Katz        | One year into COVID-19: What have we learned about child maltreatment reports and child protective service responses?                                                                                                              | Child Abuse & Neglect <a href="https://doi.org/10.1016/j.chabu.2021.105473">https://doi.org/10.1016/j.chabu.2021.105473</a>                                              | Yes | Peer    | AFRO, WPRO, PAHO, EURO, EMRO | HIC, LMIC | Australia<br>Brazil<br>USA<br>Colombia<br>Germany<br>Israel<br>Japan<br>Canada<br>South Africa<br>England | Children |              | Mental Health               | HMIS    | None                                                                                                              | March-Dec 2020                       | Yes      |                        | IncreaseMM | No           |                                         | NA |
| 131 | Kemme       | Decreased access to pediatric liver transplantation during the COVID-19 pandemic                                                                                                                                                   | Pediatric Transplantation. 2022;26:e14162. <a href="https://doi.org/10.1111/ptr.14162">https://doi.org/10.1111/ptr.14162</a>                                             | No  | Peer    | PAHO                         | HIC       | USA                                                                                                       | Children | Specialty    | Surveillance                | None    | pre-COVID-19 (March-November 2016-2019), early COVID-19 (March-May 2020), and late COVID-19 (June-November 2020). | Yes                                  |          | Decrease with recovery |            | No           |                                         | NA |
| 132 | Kenney      | Demand for regional level III neonatal services is not reduced during national COVID lockdowns                                                                                                                                     | Early Human Development Volume 163, December 2021, 105491                                                                                                                | Yes | Peer    | EURO                         | HIC       | UK                                                                                                        | Newborn  | Neonatal     | EMR                         | None    | March-June 2016-2020; Jan-March 2017-2021                                                                         | Yes                                  | Stable   |                        | No         |              | NA                                      |    |
| 133 | Khan        | Impact of COVID-19 Pandemic on Childhood Immunization in a Tertiary Health-Care Center                                                                                                                                             | Indian J Community Med. 2021 Jul-Sep; 46(3): 520-523. Published online 2021 Oct 13. doi: <a href="https://doi.org/10.4103/ijcm.IJCM_847_20">10.4103/ijcm.IJCM_847_20</a> | Yes | Peer    | SEARO                        | LMIC      | India                                                                                                     | Children |              | Immunization                | HMIS    | None                                                                                                              | Jan-July 2019-2020                   | No       | Decrease               |            | No           |                                         | NA |
| 134 | Khazaeipour | Indirect effects of COVID-19 in referring women to gynecologic oncology, perinatology and gynecology clinics in Iran                                                                                                               | Archives of Gynecology and Obstetrics (2021) 304:679-686 <a href="https://doi.org/10.1007/s00404-021-06097-5">https://doi.org/10.1007/s00404-021-06097-5</a>             | No  | Peer    | EMRO                         | LMIC      | Iran                                                                                                      | Maternal | Mat Health   | Hosp IS                     | None    | February 20 to May 20 in 2020 vs same in 2019                                                                     | No                                   | Decrease |                        | None       |              | NA                                      |    |
| 135 | Khazanchi,  | Trends in Pediatric Viral Symptoms, Influenza Testing, and SARS-CoV-2 Testing From a Statewide Electronic Health Record Consortium, January 2017 to July 2021                                                                      | Academic Ped Volume 21, Number 8 November-December 2021                                                                                                                  | Yes | Peer    | PAHO                         | HIC       | USA                                                                                                       | Children | Child Health | EMR                         | None    | January 1, 2017 through July 30, 2021                                                                             | Yes                                  | Decrease | DecreaseMM             | No         |              | NA                                      |    |
| 136 | Kieily      | COVID-19 pandemic impact on childhood vaccination coverage in Quebec, Canada                                                                                                                                                       | HUMAN VACCINES & IMMUNOTHERAPEUTICS 2022, VOL. 18, NO. 1 <a href="https://doi.org/10.1080/21645515.2021.2007707">https://doi.org/10.1080/21645515.2021.2007707</a>       | Yes | Peer    | PAHO                         | HIC       | Canada                                                                                                    | Children |              | Immunization                | EIR     | None                                                                                                              | January to November in 2019 and 2020 | Yes      | Decrease with recovery |            | No           |                                         | NA |
| 137 | Kirmanji    | Impact of COVID-19 pandemic on paediatric services at a referral centre in Pakistan: lessons from a low-income and middle-income country setting                                                                                   | Arch Dis Child 2021;106:627-628. doi:10.1136/archdischild-2020-319424                                                                                                    | No  | Peer    | SEARO                        | LMIC      | Pakistan                                                                                                  | Children |              | Immunization & Child Health | Hosp IS | None                                                                                                              | Jan-May 2020                         | No       | Decrease               |            | Yes          | Epidemic Prev & Control                 | NA |
| 138 | Kofeod      | The impact of COVID-19 lockdown on glycaemic control and use of health services among children followed at a Danish diabetes clinic                                                                                                | Acta Paediatrica. 2022;111:368-375.                                                                                                                                      | No  | Peer    | EURO                         | HIC       | Denmark                                                                                                   | Children | Specialty    | EMR                         | None    | March Jan 2018-2021                                                                                               | Yes                                  |          | StableMM               | Yes        | Telemedicine | Stable outcomes; Similar visits overall |    |
| 139 | Konson      | Quality of care indicator performance was minimally changed in 2020 despite the COVID-19 pandemic                                                                                                                                  | Israel Journal of Health Policy Research (2022) 11:9 <a href="https://doi.org/10.1186/s1584-022-00516-x">https://doi.org/10.1186/s1584-022-00516-x</a>                   | Yes | Peer    | EMRO                         | HIC       | Israel                                                                                                    | MNH      | MNH          | HMIS                        | None    | 2019-2020                                                                                                         | Yes                                  | Mixed    |                        | No         |              | NA                                      |    |

|     | A                 | C                                                                                                                                                        | D                                                                                                | E   | F    | G     | H    | I         | J        | K               | M             | N                                                                                                                                                                                                                                                                                                                                                                                          | O                                                                                                                                              | P   | S        | T                      | U    | V                                 | Y                                             |
|-----|-------------------|----------------------------------------------------------------------------------------------------------------------------------------------------------|--------------------------------------------------------------------------------------------------|-----|------|-------|------|-----------|----------|-----------------|---------------|--------------------------------------------------------------------------------------------------------------------------------------------------------------------------------------------------------------------------------------------------------------------------------------------------------------------------------------------------------------------------------------------|------------------------------------------------------------------------------------------------------------------------------------------------|-----|----------|------------------------|------|-----------------------------------|-----------------------------------------------|
| 140 | Kotiso            | Impact of the COVID-19 pandemic on the utilisation of health services at public hospitals in Yemen: a retrospective comparative study                    | BMI Open 2022;12:e047868. doi:10.1136/bmjopen-2020-047868                                        | Yes | Peer | EMRO  | LMIC | Yemen     | MCH      | MCH             | Hosp IS       | None                                                                                                                                                                                                                                                                                                                                                                                       | Jan-Jun 2019-2020                                                                                                                              | No  | Stable   |                        | No   |                                   | NA                                            |
| 141 | Kovler            | Increased proportion of physical child abuse injuries at a level I pediatric trauma center during the Covid-19 pandemic                                  | Child Abuse & Neglect 116 (2021) 104756                                                          | No  | Peer | PAHO  | HIC  | USA       | Children | Child Abuse     | Paper MR/HR   | NO Discussed limitations of diagnosis of child abuse                                                                                                                                                                                                                                                                                                                                       | March-April 2018,2019,2020                                                                                                                     | No  |          | IncreaseMM             | None |                                   | NA                                            |
| 142 | Kugelman          | Consequences of the COVID-19 pandemic on the postpartum course: Lessons learnt from a large-scale comparative study in a teaching hospital               | Int J Obs Gyn Volume153, Issue2 May 2021 Pages 315-321                                           | Yes | Peer | EMRO  | HIC  | Israel    | Maternal | Maternal Health | EMR           | None                                                                                                                                                                                                                                                                                                                                                                                       | March and April 2020 (first wave), between July to September 2020 (second wave), and a matched historical cohort throughout 2017–2019          | Yes | Stable   | StableMM               | Yes  | Protocol Change                   | Stable Outcomes                               |
| 143 | Kujawski          | Impact of the COVID-19 pandemic on pediatric and adolescent vaccinations and well child visits in the United States: A database analysis                 | Vaccine 40 (2022) 706–713                                                                        | No  | Peer | PAHO  | HIC  | USA       | Children | Child Health    | Admin/Billing | None                                                                                                                                                                                                                                                                                                                                                                                       | January 2018–March 2021                                                                                                                        | Yes |          | Decrease with Recovery | No   |                                   | NA                                            |
| 144 | Kutluk            | The effect of the COVID-19 pandemic on paediatric cancer care: lessons learnt from a major paediatric oncology department in Turkey                      | ecancer 2021, 15:1172 https://doi.org/10.3332/ecancer.2021.1172                                  | No  | Peer | EURO  | LMIC | Turkey    | Children | Specialty       | Hosp IS       | YES do not think the decreases in the treatments were due to treatment modifications since we only postponed the appointments for off-therapy patients, and never cancelled any ongoing treatments. However, due to uncertainty and different sources of information, the numbers of admissions, surgery, chemotherapy, radiotherapy decreased significantly as we reported in this study. | 'COVID-19 period' (10 March to 31 October 2020) were compared with the corresponding 'prior year control period' (10 March to 31 October 2019) | Yes | Mixed    |                        | None |                                   | NA                                            |
| 145 | Lamichhane Basant | TREND OF HOSPITAL CARE SERVICES DURING COVID-19 PANDEMIC IN A TERTIARY CARE HOSPITAL IN PROVINCE 5                                                       | Medphoenix. 2021;6(1):36-39 DOI:https://doi.org/10.3126/medphoenix.v6i1.36626                    | Yes | Peer | SEARO | LMIC | Nepal     | Maternal | Maternal Health | Paper MR/HR   | None                                                                                                                                                                                                                                                                                                                                                                                       | August 16th, 2019 to October 15th, 2020.                                                                                                       | Yes | Increase |                        | No   |                                   | NA                                            |
| 146 | Langan            | Impact of the COVID-19 pandemic on radiology appointments in a tertiary children's hospital: a retrospective study                                       | BMI Paediatrics Open 2021;5:e001210. doi:10.1136/bmjpo-2021-001210                               | No  | Peer | Euro  | HIC  | UK        | Children | Specialty       | Hosp IS       | None                                                                                                                                                                                                                                                                                                                                                                                       | (13 May 2019–28 March 2021                                                                                                                     | No  | Mixed    |                        | None |                                   | NA                                            |
| 147 | Langdon-Embry     | Rebound in Routine Childhood Vaccine Administration Following Decline During the COVID-19 Pandemic — New York City, March 1–June 27, 2020                | MMWR / July 31, 2020 / Vol. 69 / No. 30                                                          | Yes | Peer | PAHO  | HIC  | USA       | Children | Immunization    | EIR           | None                                                                                                                                                                                                                                                                                                                                                                                       | December 2019–June 2020                                                                                                                        | No  |          | Decrease with recovery | Yes  | Info Campaign                     | Vaccination rates increased to earlier levels |
| 148 | Lee               | Delay in childhood vaccinations during the COVID-19 pandemic                                                                                             | Canadian Journal of Public Health (2022) 113:126–134 https://doi.org/10.17269/s41997-021-00601-9 | Yes | Peer | PAHO  | HIC  | Canada    | Children | Immunizations   | EMR           | None                                                                                                                                                                                                                                                                                                                                                                                       | November 1, 2018 and May 31, 2020,                                                                                                             | No  |          | Decrease               |      | No                                | NA                                            |
| 149 | Leeb              | Mental Health-Related Emergency Department Visits Among Children Aged <18 Years During the COVID-19 Pandemic - United States, January 1-October 17, 2020 | MMWR Morb Mortal Wkly Rep . 2020 Nov 13;69(45):1675-1680. doi: 10.15585/mmwr.mm6945a3            | No  | Peer | PAHO  | HIC  | USA       | Children | Mental Health   | Surveillance  | None                                                                                                                                                                                                                                                                                                                                                                                       | January 1 through October 17, 2020, vs 2019                                                                                                    | Yes | Mixed    |                        | No   |                                   | NA                                            |
| 150 | Licheni           | Impact of COVID-19 public health restrictions on hospital admissions for young infants in Victoria, Australia                                            | Journal of Paediatrics and Child Health (2022) doi:10.1111/jpc.15885                             | Yes | Peer | WPRO  | HIC  | Australia | Children | EMS             | Paper MR/HR   | None                                                                                                                                                                                                                                                                                                                                                                                       | March to September in 2019 and 2020.                                                                                                           | Yes | Mixed    |                        | No   |                                   | NA                                            |
| 151 | M Gorny           | health in children and young people during a pandemic: experiences from North Central London during the first wave of COVID-19                           | BMI Paediatrics Open 2021;5:e001116. doi:10.1136/bmjpo-2021-001116                               | Yes | Peer | EURO  | HIC  | UK        | Children | Mental Health   | Hosp IS       | None                                                                                                                                                                                                                                                                                                                                                                                       | Jan-May 2020                                                                                                                                   | No  | Increase | IncreaseMM             | Yes  | Relocation of services; protocols | improved quality of care                      |

|     | A                 | C                                                                                                                                                                | D                                                                                                                                | E   | F    | G    | H    | I           | J        | K            | M                | N                                                                                                                                                                                                                                                                                 | O                                                                                                                           | P   | S                             | T          | U                       | V                                                                                                                       | Y  |
|-----|-------------------|------------------------------------------------------------------------------------------------------------------------------------------------------------------|----------------------------------------------------------------------------------------------------------------------------------|-----|------|------|------|-------------|----------|--------------|------------------|-----------------------------------------------------------------------------------------------------------------------------------------------------------------------------------------------------------------------------------------------------------------------------------|-----------------------------------------------------------------------------------------------------------------------------|-----|-------------------------------|------------|-------------------------|-------------------------------------------------------------------------------------------------------------------------|----|
| 152 | Maassel           | Hospital Admissions for Abusive Head Trauma at Children's Hospitals During COVID-19                                                                              | PEDIATRICS Volume 148, number 1, July 2021.e2021050361                                                                           | No  | Peer | PAHO | HIC  | USA         | Children | Child Abuse  | Network Database | YES Major limitation is its reliance on diagnostic coding, which may be erroneous. Additionally, admission criteria may have been more restricted during COVID-19; however, this effect may be minimal, given a similar percentage of ICU admissions, compared to previous years. | 2017-2020                                                                                                                   | Yes | Decrease                      | None       |                         |                                                                                                                         | NA |
| 153 | Maeda             | Trends in intensive neonatal care during the COVID-19 outbreak in Japan                                                                                          | Arch Dis Child Fetal Neonatal Ed 2021;106:F327-F329.<br>Am J Emerg Med. 2021 Aug; 46: 634-639<br>doi: 10.1016/j.ajem.2020.11.067 | No  | Peer | WPRO | HIC  | Japan       | Newborn  | Neonatal     | Hosp IS          | None                                                                                                                                                                                                                                                                              | 10-17 vs weeks 2-9 (during and before the outbreak) of 2020 with adjustment for the trends during the same period of 2019.  | No  | Decrease                      | DecreaseMM | No                      |                                                                                                                         | NA |
| 154 | Mahmassani        | The impact of COVID-19 lockdown measures on ED visits in Lebanon                                                                                                 | Arch Dis Child 2021;106:e18.<br>doi:10.1136/archdischild-2020-320015                                                             | No  | Peer | EMRO | LMIC | Lebanon     | Children | EMS          | Hosp IS          | None                                                                                                                                                                                                                                                                              | November 2019 to Feb 20 2020 vs Feb 21 to May 2020                                                                          | No  | Decrease                      | None       |                         |                                                                                                                         | NA |
| 155 | Mann              | Did children 'stay safe'? Evaluation of burns presentations to a children's emergency department during the period of COVID-19 school closures                   | Pediatrics. 2021; 147(6):e2020044735                                                                                             | Yes | Peer | EURO | HIC  | UK          | Children | EMS          | Hosp IS          | None                                                                                                                                                                                                                                                                              | 2019-2020                                                                                                                   | Yes | Mixed                         | None       |                         |                                                                                                                         | NA |
| 156 | Markham           | Inpatient Use and Outcomes at Children's Hospitals During the Early COVID-19 Pandemic                                                                            | Pediatrics. 2021; 147(6):e2020044735                                                                                             | Yes | Peer | PAHO | HIC  | USA         | Children | Hosp         | Network Database | NO 4 hospitals excluded for poor data quality                                                                                                                                                                                                                                     | March 15 to August 29, 2017-2020                                                                                            | No  | Decrease                      | StableMM   | No                      |                                                                                                                         | NA |
| 157 | Marques-Fernandez | Impact of Covid-19 on attendances for a 1st episode of reduced fetal movements: A retrospective observational study                                              | PLoS ONE 16(6): e0253796.<br>https://doi.org/10.1371/journal.pone.0253796                                                        | No  | Peer | EURO | HIC  | UK          | MNH      | MNH          | EMR/EHR          | None                                                                                                                                                                                                                                                                              | 01/03/2020-30/04/2020 (COVID) to 01/03/2019-30/04/2019 (Pre-COVID).                                                         | No  | Decrease                      | StableMM   | None                    |                                                                                                                         | NA |
| 158 | Maslin            | Preterm births in South-West England before and during the COVID-19 pandemic: an audit of retrospective data                                                     | European Journal of Pediatrics (2022) 181:859-863<br>https://doi.org/10.1007/s00431-021-04265-y                                  | Yes | Peer | EURO | HIC  | UK          | Newborn  | Neonatal     | Registry         | None                                                                                                                                                                                                                                                                              | 2018-2020                                                                                                                   | Yes | Decrease                      | StableMM   | No                      |                                                                                                                         | NA |
| 159 | Mason             | Reduced presentations with fractures or orthopaedic infections to a major children's hospital during a national COVID-19 elimination strategy                    | ANZ J Surg 92 (2022) 206-211                                                                                                     | Yes | Peer | WPRO | HIC  | New Zealand | Children | Specialty    | Hosp IS          | None                                                                                                                                                                                                                                                                              | March-May 2019-2020                                                                                                         | No  | Mixed                         | Yes        |                         | Outpatient procedures increased                                                                                         |    |
| 160 | Masresha          | The performance of routine immunization in selected African countries during the first six months of the COVID-19 pandemic                                       | Pan African Medical Journal. 2020;37(1):12.<br>10.11604/pamj.supp.2020.37.1.26107                                                | No  | Peer | AFRO | LMIC | Multiple    | Children | Immunization | EIR              | YES Completeness of district reporting of immunization data for the first 6 months of the years 2018 - 2020 was >95% in all countries except for South Sudan, which had a completeness of 93% and 96% in 2018 and 2019, while completeness for the first half of 2020 was 91%.    | January 2018 to June 2020                                                                                                   | No  | Mixed                         | Yes        | Change Service Platform | Some rebound is seen                                                                                                    |    |
| 161 | Mbithi            | Assessing the Real-Time Impact of COVID-19 on TB and HIV Services: The Experience and Response from Selected Health Facilities in Nairobi Kenya                  | Trop. Med. Infect. Dis. 2021, 6, 74.<br>https://doi.org/10.3390/tropicalmed6020074                                               | No  | Peer | AFRO | LMIC | Kenya       | Children | HIV/TB       | HMIS             | YES Increased DQA during period                                                                                                                                                                                                                                                   | first six months of COVID-19 (March to August 2020) and the second six months of COVID-19 (September 2020 to February 2021) | Yes | Decrease with slight recovery | Yes        | Data for targeting      | TB treatment success initially decreased, it then picked up to between 70% and 80% in the last four months of the study |    |
| 162 | McDonald          | Early impact of the coronavirus disease (COVID-19) pandemic and physical distancing measures on routine childhood vaccinations in England, January to April 2020 | Euro Surveill. 2020;25(19):pii=2000848.<br>https://doi.org/10.2807/1560-7917.ES.2020.25.19.2000848                               | Yes | Peer | EURO | HIC  | UK          | Children | Immunization | EMR/EHR          | YES Deferral of data entry could explain some decrease in real-time vaccination counts, but not the subsequent increase so COVID not considered a factor in reporting                                                                                                             | first 17 weeks of 2019 and 2020                                                                                             | No  | Mixed                         | None       |                         | NA                                                                                                                      |    |
| 163 | McDonnell         | Assessing the Impact of COVID-19 Public Health Stages on Paediatric Emergency Attendance                                                                         | Int. J. Environ. Res. Public Health 2020, 17, 6719; doi:10.3390/ijerph17186719                                                   | No  | Peer | Euro | HIC  | Ireland     | Children | EMS          | EMS IS           | None                                                                                                                                                                                                                                                                              | Jan-May 2020 vs 2018/2019                                                                                                   | No  | Decrease                      | None       |                         | NA                                                                                                                      |    |
| 164 | McDonnell*        | The impact of the Covid-19 pandemic on maternity services: A review of maternal and neonatal outcomes before, during and after the pandemic                      | European Journal of Obstetrics & Gynecology and Reproductive Biology 255 (2020) 172-176                                          | Yes | Peer | EURO | HIC  | Ireland     | MNH      | MNH          | Hosp IS          | None                                                                                                                                                                                                                                                                              | Jan-July 2018,2019,2020                                                                                                     | No  | Stable                        | DecreaseMM | No                      |                                                                                                                         | NA |

|     | A              | C                                                                                                                                                                                              | D                                                                                                                                                                                                                                                                                                                                                                                         | E   | F                | G      | H      | I            | J        | K             | M                | N                                                                           | O                                                                                                                                                   | P   | S                      | T          | U    | V             | Y                                        |
|-----|----------------|------------------------------------------------------------------------------------------------------------------------------------------------------------------------------------------------|-------------------------------------------------------------------------------------------------------------------------------------------------------------------------------------------------------------------------------------------------------------------------------------------------------------------------------------------------------------------------------------------|-----|------------------|--------|--------|--------------|----------|---------------|------------------|-----------------------------------------------------------------------------|-----------------------------------------------------------------------------------------------------------------------------------------------------|-----|------------------------|------------|------|---------------|------------------------------------------|
| 165 | McNicholas     | Referral patterns for specialist child and adolescent mental health services in the Republic of Ireland during the COVID-19 pandemic compared with 2019 and 2018                               | BJPsych Open (2021) 7, e91, 1-7. doi: 10.1192/bjpo.2021.48                                                                                                                                                                                                                                                                                                                                | No  | Peer             | EURO   | HIC    | Ireland      | Children | EMS           | HMIS             | None                                                                        | Jan-Nov 2019 vs same period 2020                                                                                                                    | No  | Mixed                  |            | None |               | NA                                       |
| 166 | McQuaid        | Uptake of infant and preschool immunisations in Scotland and England during the COVID-19 pandemic: An observational study of routinely collected data                                          | PLoS Med19(2): e1003916. https://doi.org/10.1371/journal.pmed.1003916                                                                                                                                                                                                                                                                                                                     | Yes | Peer             | EURO   | HIC    | UK           | Children | Immunizations | EIR              | None                                                                        | 2019-Oct2020                                                                                                                                        | Yes | Mixed                  | Yes        |      | Outreach      | Improved in Scotland compared to England |
| 167 | Meyer          | Impact of the COVID-19 outbreak on routine obstetrical management: a cohort study                                                                                                              | <a href="https://www.authorea.com/users/316659/articles/446791-impact-of-the-covid-19-outbreak-on-routine-obstetrical-management-a-cohort-study?commit=7f2f113eb06079ac4141fe52765762b37bd737f">https://www.authorea.com/users/316659/articles/446791-impact-of-the-covid-19-outbreak-on-routine-obstetrical-management-a-cohort-study?commit=7f2f113eb06079ac4141fe52765762b37bd737f</a> | Yes | Pre-pub          | EMRO   | HIC    | Israel       | MNH      | MNH           | Paper MR/HR      | None                                                                        | Feb-Marc 2019 2020                                                                                                                                  | No  | Stable                 | StableMM   | No   |               | NA                                       |
| 168 | Middeldorp     | Short term impact of the COVID-19 pandemic on incidence of vaccine preventable diseases and participation in routine infant vaccinations in the Netherlands in the period March-September 2020 | Vaccine 39 (2021) 1039-1043 https://doi.org/10.1016/j.vaccine.2020.12.0800264-410X                                                                                                                                                                                                                                                                                                        | No  | Peer             | EURO   | HIC    | Netherlands  | Children | Immunization  | EIR              | None                                                                        | January 2019 through September 2020 were compared with data from the five preceding years                                                           | Yes | Decrease with recovery |            | Yes  | Info Campaign | Recovery of vaccination rates            |
| 169 | Miron          | Pediatric Emergencies and Hospital Admissions in the First Six Months of the COVID-19 Pandemic in a Tertiary Children's Hospital in Romania                                                    | Children 2022, 9, 513. https://doi.org/10.3390/children9040513                                                                                                                                                                                                                                                                                                                            | Yes | Peer             | EURO   | HIC    | Romania      | Children | EMS           | Hosp IS          | None                                                                        | March-August 2019 2020                                                                                                                              | No  | Decrease               | IncreaseMM | Yes  | Telemedicine  | NA                                       |
| 170 | Monroe         | The Epidemic Within the Pandemic: Pediatric Mental Health Demands in the Setting of COVID-19                                                                                                   | Clinical Pediatrics Vol 61, Issue 3, 2022 https://doi.org.ez.lshrm.ac.uk/10.1177/92F0099228211067903                                                                                                                                                                                                                                                                                      | Yes | Peer             | PAHO   | HIC    | USA          | Children | Mental Health | Paper MR/HR      | NO Comparison of paper vs electronic MR                                     | July 2017-Jan2021                                                                                                                                   | Yes | Increase               |            | No   |               | NA                                       |
| 171 | Mor            | Impact of the COVID-19 Pandemic on Excess Perinatal Mortality and Morbidity in Israel                                                                                                          | Am J Perinatol 2021;38:398-403.                                                                                                                                                                                                                                                                                                                                                           | No  | Peer             | EMRO   | HIC    | Israel       | MNH      | MNH           | EMR              | None                                                                        | February 21 and April 30 2017-2020                                                                                                                  | No  | Decrease               | MixedMM    | No   |               | NA                                       |
| 172 | Moreno-Montoya | Impact of the COVID-19 pandemic on routine childhood immunisation in Colombia                                                                                                                  | Arch Dis Child Epub ahead of print; please include Day Month Year). doi:10.1136/archdischild-2021-321792                                                                                                                                                                                                                                                                                  | Yes | Peer             | PAHO   | LMIC   | Colombia     | Children | Immunization  | EIR              | NO Discussed routine DQA methods, noted no precise data available on delays | March and October 2019 and during the same period in 2020;                                                                                          | Yes | Decrease               |            | None |               | NA                                       |
| 173 | Moura          | The impact of COVID-19 on routine pediatric vaccination delivery in Brazil                                                                                                                     | Vaccine Volume 40, Issue 15, 1 April 2022, Pages 2292-2298                                                                                                                                                                                                                                                                                                                                | Yes | Peer             | PAHO   | LMIC   | Brazil       | Children | Immunizations | HMIS             | None                                                                        | 2015-2020                                                                                                                                           | Yes | Decrease               |            | No   | NA            |                                          |
| 174 | Muhoza         | Routine Vaccination Coverage — Worldwide, 2020                                                                                                                                                 | Morbidity and Mortality Weekly Report Weekly / Vol. 70 / No. 43 October 29, 2021                                                                                                                                                                                                                                                                                                          | No  | Peer             | Global | Global | Global       | Children | Immunizations | Surveillance     | None                                                                        | 2010, 2019, 2020                                                                                                                                    | Yes | Decrease               |            | No   |               | NA                                       |
| 175 | Munaretto      | Acute events in children with sickle cell disease in Italy during the COVID-19 pandemic: useful lessons learned                                                                                | 2021 British Society for Haematology and John Wiley & Sons Ltd doi: 10.1111/bjh.17546                                                                                                                                                                                                                                                                                                     | No  | Peer             | Euro   | HIC    | Italy        | Children | EMS           | Network Database | None                                                                        | 2019 vs 2020 (21 February-30 April 2020)                                                                                                            | No  | Mixed                  |            | Yes  | Telemedicine  | Improved Health of children with SCD     |
| 176 | Musser         | Child maltreatment in the time of COVID-19: Changes in the Florida foster care system surrounding the COVID-19 safer-at-home order                                                             | Child Abuse & Neglect 116 (2021) 104945 https://doi.org/10.1016/j.chabu.2021.104945                                                                                                                                                                                                                                                                                                       | No  | Peer             | PAHO   | HIC    | USA          | Children | Child Abuse   | HMIS             | None                                                                        | April 2019 vs April 2020                                                                                                                            | No  | Mixed                  |            | None |               | NA                                       |
| 177 | Mutyambizi     | Effect of COVID-19 on HIV, tuberculosis, and prevention of mother-to-child transmission of HIV indicators in Mopani district, South Africa                                                     | S Afr Med J 2021;111(12):1181-1189. https://doi.org/10.7196/SA MJ.2021.v111i12.15822                                                                                                                                                                                                                                                                                                      | No  | Peer             | AFRO   | LMIC   | South Africa | MCH      | HIV/TB        | HMIS             | None                                                                        | January March 2020 and April - June 2020 periods, and differences in means for the period April - December 2019 v. the period April - December 2020 | Yes | Mixed                  |            | No   |               | NA                                       |
| 178 | Nigeria MOH    | Health Service Uptake during COVID-19 Interactive Website                                                                                                                                      | <a href="https://msdat.fmhconnect.gov.ng/covid/index.html">https://msdat.fmhconnect.gov.ng/covid/index.html</a>                                                                                                                                                                                                                                                                           | Yes | Country Database | AFRO   | LMIC   | Nigeria      | MCH      | MCH           | HMIS             | YES NHMIS Reporting Rate lower during 2020 but 2021 similar to 2019         | 2019-2021                                                                                                                                           | Yes | Mixed                  |            | None |               | NA                                       |

|     | A                | C                                                                                                                                                                | D                                                                                                                                                                       | E   | F    | G          | H    | I                                          | J        | K               | M                | N                                                                                                                                                       | O                                                                                                                                         | P   | S                      | T          | U    | V               | Y        |
|-----|------------------|------------------------------------------------------------------------------------------------------------------------------------------------------------------|-------------------------------------------------------------------------------------------------------------------------------------------------------------------------|-----|------|------------|------|--------------------------------------------|----------|-----------------|------------------|---------------------------------------------------------------------------------------------------------------------------------------------------------|-------------------------------------------------------------------------------------------------------------------------------------------|-----|------------------------|------------|------|-----------------|----------|
| 179 | Nourazari        | Decreased hospital admissions through emergency departments during the COVID-19 pandemic                                                                         | American Journal of Emergency Medicine<br><a href="https://doi.org/10.1016/j.ajem.2020.11.029">https://doi.org/10.1016/j.ajem.2020.11.029</a>                           | Yes | Peer | PAHO       | HIC  | USA                                        | Children | Hosp            | Admin/Billing    | None                                                                                                                                                    | 1/1/2019-9/9/2019 and 1/1/2020-9/8/2020                                                                                                   | Yes | Decrease               |            | No   |                 | NA       |
| 180 | Nuzhath          | Childhood immunization during the COVID-19 pandemic in Texas                                                                                                     | Vaccine 39 (2021) 3333-3337<br><a href="https://doi.org/10.1016/j.vaccine.2021.04.050">https://doi.org/10.1016/j.vaccine.2021.04.050</a>                                | No  | Peer | PAHO       | HIC  | USA                                        | Children | Immunization    | EIR              | None                                                                                                                                                    | 2010-2020                                                                                                                                 | Yes | Decrease               |            | None |                 | NA       |
| 181 | Oliszewska       | Management of the Oral Health of Children During the COVID-19 Pandemic in Poland                                                                                 | Front. Public Health 9:635081.<br>doi:10.3389/fpubh.2021.635081                                                                                                         | No  | Peer | EURO       | HIC  | Poland                                     | Children | Specialty       | Paper MR/HR      | NO correctly filled forms only were accepted in the study and these served as a sources of data. - No mention of rate of incorrect or incomplete forms. | March and April of 2019 compared to same period 2020                                                                                      | No  | Mixed                  |            | None |                 | NA       |
| 182 | Oulasvirta       | Paediatric prehospital emergencies and restrictions during the COVID-19 pandemic: a population-based study                                                       | BMI Paediatrics Open 2020;4:e000808.<br>doi:10.1136/bmjpo-2020-000808                                                                                                   | No  | Peer | EURO       | HIC  | Finland                                    | Children | EMS             | EMS IS           | None                                                                                                                                                    | March 2020-31 May 2020 (study period) and equivalent periods in 2017-2019 (control periods)                                               | No  | Mixed                  | IncreaseMM | None |                 | NA       |
| 183 | Ozbay            | The Impact of Covid-19 pandemic related lockdown on clubfoot practice                                                                                            | Medicine (2021) 100:25                                                                                                                                                  | Yes | Peer | EURO       | HIC  | Turkey                                     | Children | Specialty       | Hosp IS          | None                                                                                                                                                    | March-Dec 2018-2020                                                                                                                       | Yes | Increase               |            | No   |                 | NA       |
| 184 | Paiva            | Impact of COVID-19 on a paediatric emergency service                                                                                                             | European Journal of Pediatrics<br><a href="https://doi.org/10.1007/s00431-021-04095-y">https://doi.org/10.1007/s00431-021-04095-y</a>                                   | No  | Peer | EURO       | HIC  | Portugal                                   | Children | EMS             | Hosp IS          | None                                                                                                                                                    | March - June 2017-2020                                                                                                                    | No  | Mixed                  | MixedMM    | None |                 | NA       |
| 185 | Park             | Impact of the COVID-19 Pandemic on Pediatric Surgical Volume in Four Low- and Middle-Income Country Hospitals: Insights from an Interrupted Time Series Analysis | World J Surg (2022) 46:984-993<br><a href="https://doi.org/10.1007/s00268-022-06503-2">https://doi.org/10.1007/s00268-022-06503-2</a>                                   | Yes | Peer | PAHO, AFRO | LMIC | Burkina Faso, Ecuador, Nigeria, and Zambia | Children | Hosp            | Network Database | None                                                                                                                                                    | January 1, 2019, to April 30, 2021.                                                                                                       | Yes | Decrease               | DecreaseMM | No   |                 | NA       |
| 186 | Patel Murthy     | Impact of the COVID-19 Pandemic on Administration of Selected Routine Childhood and Adolescent Vaccinations – 10 U.S. Jurisdictions, March–September 2020        | MMWR / June 11, 2021 / Vol. 70 / No. 23                                                                                                                                 | Yes | Peer | PAHO       | HIC  | USA                                        | Children | Immunization    | EIR              | None                                                                                                                                                    | March–May 2020, and June– September 2020 vs 2018 and 2019                                                                                 | Yes | Decrease               |            | None |                 | NA       |
| 187 | PATH             | RMNCAH-N Services During COVID-19: A spotlight on India's policy responses to maintain and adapt essential health services                                       | <a href="https://path.azureedge.net/media/documents/India_RMNCN_Deep_Dive_brief.pdf">https://path.azureedge.net/media/documents/India_RMNCN_Deep_Dive_brief.pdf</a>     | No  | Grey | SEARO      | LMIC | India                                      | MCH      | MCH             | HMIS             | None                                                                                                                                                    | 2018-2020                                                                                                                                 | Yes | Decrease with recovery |            | None |                 | NA       |
| 188 | PATH             | RMNCAH-N Services During COVID-19: A spotlight on Nigeria's policy responses to maintain and adapt essential health services                                     | <a href="https://path.azureedge.net/media/documents/Nigeria_RMNCN_Deep_Dive_brief.pdf">https://path.azureedge.net/media/documents/Nigeria_RMNCN_Deep_Dive_brief.pdf</a> | No  | Grey | AFRO       | LMIC | Nigeria                                    | MCH      | MCH             | HMIS             | None                                                                                                                                                    | April 2020 compared to April 2019                                                                                                         | No  | Mixed                  |            | None |                 | NA       |
| 189 | Patkar-Kattimani | COVID-19 and obstetric anaesthetic services in a tertiary maternity care unit                                                                                    | International Journal of Obstetric Anesthesia (2021) 45, 152–153                                                                                                        | Yes | Peer | EURO       | HIC  | UK                                         | Maternal | Maternal Health | Hosp IS          | None                                                                                                                                                    | October 1 to December 31, 2019 (pre COVID-19) were compared with a three-month pandemic period from March 12 to June 11, 2020 (COVID-19). | No  | Stable                 |            | No   |                 | NA       |
| 190 | Pelletier,       | Trends in US Pediatric Hospital Admissions in 2020 Compared With the Decade Before the COVID-19 Pandemic                                                         | JAMA Network Open. 2021;4(2):e2037227.<br>doi:10.1001/jamanetworkopen.2020.37227                                                                                        | No  | Peer | PAHO       | HIC  | USA                                        | Children | EMS             | Network Database | None                                                                                                                                                    | 2010-2020                                                                                                                                 | Yes | Decrease               |            | None |                 | NA       |
| 191 | Percul           | Impact of the COVID-19 pandemic on the pediatric population with acute appendicitis: Experience at a general, tertiary care hospital                             | Arch Argent Pediatr 2021;119(4):224-229                                                                                                                                 | Yes | Peer | PAHO       | LMIC | Argentina                                  | Children | Specialty       | Hosp IS          | None                                                                                                                                                    | March-Aug 2019 2020                                                                                                                       | No  | Decrease               | StableMM   | Yes  | Protocol Change | StableMM |



|     | A             | C                                                                                                                                                                                                                                  | D                                                                                                      | E   | F    | G     | H    | I          | J        | K               | M             | N                         | O                                                                                                                              | P   | S        | T                             | U          | V            | Y                                                      |
|-----|---------------|------------------------------------------------------------------------------------------------------------------------------------------------------------------------------------------------------------------------------------|--------------------------------------------------------------------------------------------------------|-----|------|-------|------|------------|----------|-----------------|---------------|---------------------------|--------------------------------------------------------------------------------------------------------------------------------|-----|----------|-------------------------------|------------|--------------|--------------------------------------------------------|
| 192 | Philip        | Unprecedented reduction in births of very low birthweight (VLBW) and extremely low birthweight (ELBW) infants during the COVID-19 lockdown in Ireland: a 'natural experiment' allowing analysis of data from the prior two decades | BMJ Global Health 2020;5:e003075. doi:10.1136/bmjgh-2020-003075                                        | No  | Peer | EURO  | HIC  | Ireland    | Neonatal | Neonatal        | Hosp IS       | None                      | Jan-April 2001-2020                                                                                                            | No  |          | DecreaseMM                    | None       |              | NA                                                     |
| 193 | Potenza       | Business as usual during the COVID-19 pandemic? Reflections on state-wide trends in maternity telehealth consultations during lockdown in Victoria and New South Wales                                                             | ANZIOG Volume61, Issue6 December 2021 Pages 982-985 https://doi.org/10.1111/ajo.13438                  | Yes | Peer | WPRO  | HIC  | Australia  | Maternal | Maternal Health | HMIS          | None                      | 1 January 2018 to 30 April 2021                                                                                                | Yes | Stable   |                               | Yes        | Telemedicine | Maintain overall contacts by using telehealth contacts |
| 194 | Quifer-Rada,  | Impact of COVID-19 Pandemic in Breastfeeding Consultations on LactApp, an m-Health Solution for Breastfeeding Support                                                                                                              | TELEMEDICINE and e-HEALTH DOI: 10.1089/tmj.2021.0586                                                   | Yes | Peer | EURO  | HIC  | Spain      | MNH      | MNH             | HMIS          | None                      | July 2018 and March 2021                                                                                                       | Yes | Increase |                               | Yes        | Telemedicine | Increased us of app                                    |
| 195 | Qureshi       | Impact of COVID-19 Lockdown on Admissions to a Tertiary Maternity Hospital in Srinagar                                                                                                                                             | Journal of South Asian Federation of Obstetrics and Gynaecology (2021): 10.5005/jp-journals-10006-1857 | Yes | Peer | SEARO | LMIC | India      | Maternal | EMS             | Hosp IS       | None                      | March 2020 to August 2020 (COVID-19 data) March 2019 to August 2019 (pre-COVID-19)                                             | No  | Decrease | MixedMM                       | No         |              | NA                                                     |
| 196 | R Mongru      | Retrospective analysis of North West London healthcare utilisation by children during the COVID-19 pandemic                                                                                                                        | BMJ Paediatrics Open 2022;5:e001363. doi:10.1136/bmjpo-2021-001363                                     | Yes | Peer | EURO  | HIC  | UK         | Children | EMS/Hosp        | HMIS          | None                      | 2015 and 2021.                                                                                                                 | Yes | Decrease |                               | No         |              | NA                                                     |
| 197 | Radhakrishnan | Pediatric Emergency Department Visits Before and During the COVID-19 Pandemic — United States, January 2019–January 2022                                                                                                           | MMWR / February 25, 2022 / Vol. 71 / No. 8                                                             | No  | Peer | PAHO  | HIC  | USA        | Children | EMS             | Surveillance  | None                      | 2019–January 2022.                                                                                                             | Yes |          | Decrease with slight recovery | No         |              | NA                                                     |
| 198 | Rahman        | Impact of the COVID-19 lockdown on routine vaccination in Pakistan: a hospital-based study                                                                                                                                         | Vaccines & Immunotherapeutics, 17:12, 4934-4940, DOI: 10.1080/21645515.2021.1979380                    | Yes | Peer | SEARO | LMIC | Pakistan   | Children | Immunizations   | EIR           | None                      | 01 November 2019 to the end of March, 2020 was defined as pre-lockdown 5. The period from 01 April 2020 to end of August, 2020 | No  |          | Decrease with slight recovery | No         |              | NA                                                     |
| 199 | Raitio        | Reduced number of pediatric orthopedic trauma requiring operative treatment during COVID-19 restrictions: A nationwide cohort study                                                                                                | Scandinavian Journal of Surgery 2021, Vol. 110(2) 254–257                                              | Yes | Peer | EURO  | HIC  | Finland    | Children | EMS/Hosp        | Hosp IS       | None                      | March and 31 May were identified covering years from 2017 to 2020                                                              | No  | Decrease | DecreaseMM                    | No         |              | NA                                                     |
| 200 | Rana          | Post-disruption catch-up of child immunisation and health-care services in Bangladesh                                                                                                                                              | Lancet Infection March 30, 2021 https://doi.org/10.1016/S1473-3099(21)00148-1                          | Yes | Peer | SEARO | LMIC | Bangladesh | Children | Immunization    | HMIS          | None                      | 2019 and 2020                                                                                                                  | Yes |          | Decrease with Recovery        | Yes        | Multiple     | Recovery/catchup of vaccination rates                  |
| 201 | Rana          | Emergence of measles during the COVID-19 pandemic threatens Pakistan's children and the wider region                                                                                                                               | Nature Medicine   VOL 27   July 2021   1126–1134                                                       | Yes | Peer | SEARO | LMIC | Pakistan   | Children | Child Health    | Surveillance  | None                      | Jan-Apr 2016-2021                                                                                                              | Yes |          |                               | IncreaseMM | No           | NA                                                     |
| 202 | Ranjbar       | Changes in pregnancy outcomes during the COVID-19 lockdown in Iran                                                                                                                                                                 | BMC Pregnancy and Childbirth (2021) 21:577 https://doi.org/10.1186/s12884-021-04050-7                  | No  | Peer | EMRO  | HIC  | Iran       | Maternal | Mat Health      | Paper MR/HR   | None                      | pre-Covid-19 pandemic (February 19 to April 19, 2019) and the intra-Covid-19 pandemic (February 19 to April 19, 2020) period.  | No  | Mixed    | MixedMM                       | None       |              | NA                                                     |
| 203 | Raucci        | Impact of the COVID-19 pandemic on the Emergency Department of a tertiary children's hospital                                                                                                                                      | Italian Journal of Pediatrics (2021) 47:21 https://doi.org/10.1186/s13052-021-00976-y                  | Yes | Peer | EURO  | HIC  | Italy      | Children | EMS             | Hosp IS       | None                      | Feb April 2019-2020                                                                                                            | No  | Mixed    |                               | No         |              | NA                                                     |
| 204 | Rhedin        | Reduction in paediatric emergency visits during the COVID-19 pandemic in a region with open preschools and schools                                                                                                                 | Acta Paediatrica. 2021;110:2802–2804.                                                                  | Yes | Peer | EURO  | HIC  | Sweden     | Children | EMS             | Admin/Billing | None                      | 2018-2020                                                                                                                      | Yes | Decrease |                               | No         |              | NA                                                     |
| 205 | Rozenfeld     | COVID-19 Changed the Injury Patterns of Hospitalized Patients                                                                                                                                                                      | Prehospital and Disaster Medicine https://doi.org/10.1017/S149023X21000285                             | Yes | Peer | EMRO  | HIC  | Israel     | Children | EMS             | Registry      | NO Standard data cleaning | March 15-April 30 2016-2020                                                                                                    | No  | Mixed    |                               | No         |              | NA                                                     |
| 206 | Rusconi       | Delayed presentation of children to the emergency department during the first wave of COVID-19 pandemic in Italy: Areabased cohort study                                                                                           | Acta Paediatrica. 2021;110:2796–2801. DOI: 10.1111/apa.16019                                           | Yes | Peer | EURO  | HIC  | Italy      | Children | EMS             | Admin/Billing | None                      | Feb-May in 2018,2019, 2020                                                                                                     | No  | Decrease |                               | None       |              | NA                                                     |

|     | A          | C                                                                                                                                                                                                                                       | D                                                                                                                                                                                          | E   | F    | G    | H    | I                                 | J        | K               | M             | N                                                                                                               | O                                                                            | P   | S                             | T          | U    | V            | Y                                                                             |
|-----|------------|-----------------------------------------------------------------------------------------------------------------------------------------------------------------------------------------------------------------------------------------|--------------------------------------------------------------------------------------------------------------------------------------------------------------------------------------------|-----|------|------|------|-----------------------------------|----------|-----------------|---------------|-----------------------------------------------------------------------------------------------------------------|------------------------------------------------------------------------------|-----|-------------------------------|------------|------|--------------|-------------------------------------------------------------------------------|
| 207 | Sabbatucci | Childhood Immunisation Coverage during the COVID-19 Epidemic in Italy                                                                                                                                                                   | Vaccines 2022, 10, 120. <a href="https://doi.org/10.3390/vaccines10010120">https://doi.org/10.3390/vaccines10010120</a>                                                                    | Yes | Peer | EURO | HIC  | Italy                             | Children | Immunization    | EIR           | None                                                                                                            | 2019 and 2020                                                                | Yes | Mixed                         |            | No   |              | NA                                                                            |
| 208 | Sakowicz   | The association between the COVID-19 pandemic and postpartum care provision                                                                                                                                                             | Am J Obstet Gynecol MFM 2021;3:100460. <a href="http://dx.doi.org/10.1016/j.ajogmf.2021.100460">http://dx.doi.org/10.1016/j.ajogmf.2021.100460</a>                                         | No  | Peer | PAHO | HIC  | USA                               | Maternal | Mental Health   | EMR/EHR       | None                                                                                                            | September 1, 2018, and January 1, 2019 vs February 1, 2020, and May 15, 2020 | No  | Decrease                      |            | None |              | NA                                                                            |
| 209 | Salti,     | Obstetrics and gynecology emergency services during the coronavirus disease 2019 pandemic                                                                                                                                               | NOVEMBER 2020 AJOG MFM                                                                                                                                                                     | No  | Peer | EURO | HIC  | Italy                             | Maternal | EMS             | Paper MR/HR   | None                                                                                                            | March 2019 vs 2020                                                           | No  | Decrease                      | IncreaseMM | No   |              | NA                                                                            |
| 210 | Sanford    | Changes in pediatric trauma during COVID-19 stay-at-home epoch at a tertiary pediatric hospital                                                                                                                                         | Journal of Pediatric Surgery 56 (2021) 918–922                                                                                                                                             | Yes | Peer | PAHO | HIC  | USA                               | Children | EMS             | Registry      | None                                                                                                            | March 15th thru May 15th during the years 2015–2020.                         | No  | Mixed                         |            | No   |              | NA                                                                            |
| 211 | Sano       | Large decrease in paediatric hospitalisations during the COVID-19 outbreak in Japan                                                                                                                                                     | BMI Paediatrics Open 2021;5:e001013. <a href="https://doi.org/10.1136/bmjpo-2020-001013">doi:10.1136/bmjpo-2020-001013</a>                                                                 | Yes | Peer | WPRO | HIC  | Japan                             | Children | Hosp            | Admin/Billing | None                                                                                                            | Jan-May 2017 to 2020                                                         | No  | Decrease                      |            | No   |              | NA                                                                            |
| 212 | Santoli    | Effects of the COVID-19 Pandemic on Routine Pediatric Vaccine Ordering and Administration — United States, 2020                                                                                                                         | MMWR / May 15, 2020 / Vol. 69 / No. 19                                                                                                                                                     | No  | Peer | PAHO | HIC  | USA                               | Children | Immunization    | EIR, LMIS     | None                                                                                                            | Jan to April 2020                                                            | No  | Decrease                      |            | None |              | NA                                                                            |
| 213 | Saunders   | Pediatric primary care in Ontario and Manitoba after the onset of the COVID-19 pandemic: a population-based study                                                                                                                       | CMAJ OPEN, 9(4) E1149-1158                                                                                                                                                                 | Yes | Peer | PAHO | HIC  | Canada                            | Children | Child Health    | Admin/Billing | None                                                                                                            | Jan. 1, 2017, and Nov. 28, 2020                                              | Yes | Decrease with slight recovery |            | No   |              | NA                                                                            |
| 214 | Selinger   | Impact of the coronavirus infectious disease (COVID-19) pandemic on the provision of inflammatory bowel disease (IBD) antenatal care and outcomes of pregnancies in women with IBD                                                      | BMI Open Gastro 2021;8:e000603. <a href="https://doi.org/10.1136/bmjgast-2021-000603">doi:10.1136/bmjgast-2021-000603</a>                                                                  | No  | Peer | EURO | HIC  | UK                                | Maternal | Maternal Health | Paper MR/HR   | NO Mostly retrospective data collection has led to some missing data (not quantified), which may introduce bias | March to August 2020 compared to unspecified pre-pandemic period             | No  | Stable                        |            | Yes  | Telemedicine | Stated outcomes reassuring but no comparison included, only descriptive stats |
| 215 | Semaan     | 'We are not going to shut down, because we cannot postpone pregnancy': a mixed-methods study of the provision of maternal healthcare in six referral maternity wards in four sub-Saharan African countries during the COVID-19 pandemic | BMI Global Health 2022;7:e008063. <a href="https://doi.org/10.1136/bmjgh-2021-008063">doi:10.1136/bmjgh-2021-008063</a>                                                                    | Yes | Peer | AFRO | LMIC | Guinea, Nigeria, Tanzania, Uganda | Maternal | Maternal Health | Paper HMIS    | None                                                                                                            | 1 January 2019 and 28 February 2021                                          | Yes | Stable                        |            | Yes  | Multiple     | Stable Access                                                                 |
| 216 | Sen        | Disparities in Telehealth Utilization in a Population of Publicly Insured Children During the COVID-19 Pandemic                                                                                                                         | Population Health Management. Apr 2022. 178-185. <a href="https://doi.org/10.1089/pop.2021.0343">https://doi.org/10.1089/pop.2021.0343</a> Published in Volume: 25 Issue 2: April 19, 2022 | Yes | Peer | PAHO | HIC  | USA                               | Children | Child Health    | Admin/Billing | None                                                                                                            | March-Dec 2019 vs 2020                                                       | Yes | Mixed                         |            | Yes  | Telemedicine | Increase telemed                                                              |
| 217 | Sevalie    | The impact of the COVID-19 pandemic on hospital utilisation in Sierra Leone                                                                                                                                                             | BMI Global Health 2021;6:e005988. <a href="https://doi.org/10.1136/bmjgh-2021-005988">doi:10.1136/bmjgh-2021-005988</a>                                                                    | Yes | Peer | AFRO | LMIC | Sierra Leone                      | MCH      | MCH             | Hosp IS       | None                                                                                                            | 1 January 2020 to 30 September 2020                                          | Yes | Stable                        |            | No   |              | NA                                                                            |

|     | A             | C                                                                                                                                                                                                                                                  | D                                                                                                                                                                                              | E   | F       | G     | H    | I        | J        | K            | M           | N                                                                                                                                                                                                                                                                                                                                                                                                                                                                                                                                                                                                                                                                                                                                                                               | O                                                                                                      | P   | S        | T          | U    | V        | Y  |
|-----|---------------|----------------------------------------------------------------------------------------------------------------------------------------------------------------------------------------------------------------------------------------------------|------------------------------------------------------------------------------------------------------------------------------------------------------------------------------------------------|-----|---------|-------|------|----------|----------|--------------|-------------|---------------------------------------------------------------------------------------------------------------------------------------------------------------------------------------------------------------------------------------------------------------------------------------------------------------------------------------------------------------------------------------------------------------------------------------------------------------------------------------------------------------------------------------------------------------------------------------------------------------------------------------------------------------------------------------------------------------------------------------------------------------------------------|--------------------------------------------------------------------------------------------------------|-----|----------|------------|------|----------|----|
| 218 | Shakespeare   | Resilience and vulnerability of maternity services in Zimbabwe: a comparative analysis of the effect of Covid-19 and lockdown control measures on maternal and perinatal outcomes, a single-centre cross-sectional study at Mpilo Central Hospital | BMC Pregnancy Childbirth (2021) 21:416<br><a href="https://doi.org/10.1186/s12884-021-03884-5">https://doi.org/10.1186/s12884-021-03884-5</a>                                                  | No  | Peer    | AFRO  | LMIC | Zimbabwe | MNH      | MNH          | Hosp IS     | YES A major strength of this study is that it relies on routinely collected and contemporaneously reported data from the maternity department. This means that data is readily and quickly available to monitor outcomes and trends, and any systematic errors in data collection are likely to remain constant from month to month. During the study period there was no statistical difference in the number of man-hours worked before and during the lockdown, indicating that the unit received the usual personnel coverage, hence there was little changes in clinical outcomes. However, it is possible that if wards were to be extremely short-staffed and staff working under additional pressure due to the pandemic, this may affect the way they report outcomes, | Jan-March versus April-June 2020                                                                       | No  | Decrease | StableMM   | None |          | NA |
| 219 | Shalitin      | Changes in body mass index in children and adolescents in Israel during the COVID-19 pandemic                                                                                                                                                      | International Journal of Obesity; <a href="https://doi.org/10.1038/s41366-022-01092-5">https://doi.org/10.1038/s41366-022-01092-5</a>                                                          | Yes | Peer    | EMRO  | HIC  | Israel   | Children | Child Health | EMR         | None                                                                                                                                                                                                                                                                                                                                                                                                                                                                                                                                                                                                                                                                                                                                                                            | 2017–2019 (pre-pandemic period) and one between April 1, 2020 and December 31, 2020 (pandemic period). | Yes |          | IncreaseMM | No   |          | NA |
| 220 | Shanmugavadev | Changing patterns of emergency paediatric presentations during the first wave of COVID-19: learning for the second wave from a UK tertiary emergency department                                                                                    | BMI Paediatrics Open 2021;5:e000967. doi:10.1136/bmjpo-2020-000967                                                                                                                             | Yes | Peer    | EURO  | HIC  | UK       | Children | EMS          | EMR         | None                                                                                                                                                                                                                                                                                                                                                                                                                                                                                                                                                                                                                                                                                                                                                                            | 2 March 2020–3 May 2020) compared with 2019                                                            | No  | Decrease | StableMM   | No   |          | NA |
| 221 | Shapira       | Disruptions in maternal and child health service utilization during COVID-19: analysis from eight sub-Saharan African countries                                                                                                                    | Health Policy and Planning, 36, 2021, 1140–1151 DOI: <a href="https://doi.org/10.1093/heapol/czab064">https://doi.org/10.1093/heapol/czab064</a> Advance access publication date: 19 June 2021 | Yes | Peer    | AFRO  | LMIC | Uganda   | MCH      | MCH          | HMIS        | YES Cite limitations of routine data, including potential reporting disruption due to COVID. Adjust for outliers and missing reports. Report data completeness in supp materials                                                                                                                                                                                                                                                                                                                                                                                                                                                                                                                                                                                                | Jan 2018 to Feb 2020                                                                                   | No  | Decrease |            | None |          | NA |
| 222 | Sharma        | COVID-19: Differences in sentinel injury and child abuse reporting                                                                                                                                                                                 | Child Abuse Negl. 2021 Jun; 116: 104990. Published                                                                                                                                             | No  | Peer    | PAHO  | HIC  | USA      | Children | Child Abuse  | EMR/EHR     | None                                                                                                                                                                                                                                                                                                                                                                                                                                                                                                                                                                                                                                                                                                                                                                            | March 15 to July 31 of 2017, 2018, 2019, and 2020                                                      | No  | Mixed    |            | None |          | NA |
| 223 | Sharma,       | The Impact of COVID-19 Pandemic on Access to Treatment for Children With Cancer in India and Treating Center Practices                                                                                                                             | Cancer February 1, 2022 DOI: 10.1002/cncr.33945.                                                                                                                                               | Yes | Peer    | SEARO | LMIC | India    | Children | Specialty    | Hosp IS     | None                                                                                                                                                                                                                                                                                                                                                                                                                                                                                                                                                                                                                                                                                                                                                                            | January 1, 2020, to May 31, 2020                                                                       | No  | Decrease |            | Yes  | Multiple | NA |
| 224 | Sheridan      | Where have all the emergency paediatric mental health patients gone during COVID-19?                                                                                                                                                               | Acta Paediatrica. 2021;110:598–599.                                                                                                                                                            | Yes | Peer    | PAHO  | HIC  | USA      | Children | EMS          | EMR         | None                                                                                                                                                                                                                                                                                                                                                                                                                                                                                                                                                                                                                                                                                                                                                                            | April 1, 2019, to April 29, 2020                                                                       | No  | Decrease |            | No   |          | NA |
| 225 | Sherman       | How Did the Number and Type of Injuries in Patients Presenting to a Regional Level I Trauma Center Change During the COVID-19 Pandemic with a Stay-at-home Order?                                                                                  | Clinical Orthopaedics and Related Research: February 2021 - Volume 479 - Issue 2 - p 266-275 doi: 10.1097/CORR.0000000000001484                                                                | Yes | Peer    | PAHO  | HIC  | USA      | Children | EMS          | Registry    | None                                                                                                                                                                                                                                                                                                                                                                                                                                                                                                                                                                                                                                                                                                                                                                            | 2017 to 2020                                                                                           | Yes | Decrease |            | No   |          | NA |
| 226 | Shichijo      | Patient attendance at a pediatric emergency referral hospital in an area with low COVID-19 incidence                                                                                                                                               | PLoS ONE16(10): e0258478. <a href="https://doi.org/10.1371/journal.pone.0258478">https://doi.org/10.1371/journal.pone.0258478</a>                                                              | Yes | Peer    | WPRO  | HIC  | Japan    | Children | EMS          | Paper MR/HR | None                                                                                                                                                                                                                                                                                                                                                                                                                                                                                                                                                                                                                                                                                                                                                                            | 017–2019, before the COVID-19 pandemic, with 2020                                                      | Yes | Mixed    |            | No   |          | NA |
| 227 | Shikuku       | Early indirect impact of COVID-19 pandemic on utilization and outcomes of reproductive, maternal, newborn, child and adolescent health services in Kenya                                                                                           | medRxiv preprint doi: <a href="https://doi.org/10.1101/2020.09.09.20191247">https://doi.org/10.1101/2020.09.09.20191247</a> ; t                                                                | No  | Pre-pub | AFRO  | LMIC | Kenya    | MCH      | MCH          | HMIS        | NO However, the use of DHIS2 data poses key data quality challenges including inaccurate and incomplete reporting that are prevalent in low and middle-income countries                                                                                                                                                                                                                                                                                                                                                                                                                                                                                                                                                                                                         | March to June 2019 vs 2020                                                                             | No  | Mixed    | MixedMM    | None |          | NA |
| 228 | Shimels       | The Trend of Health Service Utilization and Challenges Faced During the COVID-19 Pandemic at Primary Units in Addis Ababa: A Mixed-Methods Study                                                                                                   | Health Services Research and Managerial Epidemiology Volume 8: 1-8 2021 DOI: 10.1177/23333928211031119                                                                                         | Yes | Peer    | AFRO  | LMIC | Ethiopia | MCH      | MCH          | HMIS        | None                                                                                                                                                                                                                                                                                                                                                                                                                                                                                                                                                                                                                                                                                                                                                                            | September 2019 to July 2020                                                                            | No  | Stable   |            | No   |          | NA |
| 229 | Shimels       | The Trend of Health Service Utilization and Challenges Faced During the COVID-19 Pandemic at Primary Units in Addis Ababa: A Mixed-Methods Study                                                                                                   | Health Services Research and Managerial Epidemiology Volume 8: 1-8 DOI: 10.1177/23333928211031119                                                                                              | No  | Peer    | AFRO  | LMIC | Ethiopia | MCH      | MCH          | HMIS        | None                                                                                                                                                                                                                                                                                                                                                                                                                                                                                                                                                                                                                                                                                                                                                                            | Sept 2019-July 2020                                                                                    | No  | Mixed    |            | None |          | NA |

|     | A               | C                                                                                                                                                                                                                                     | D                                                                                                               | E   | F       | G     | H    | I            | J        | K             | M          | N                                                                                                                                                                             | O                                                                                    | P   | S                      | T          | U            | V  | Y |
|-----|-----------------|---------------------------------------------------------------------------------------------------------------------------------------------------------------------------------------------------------------------------------------|-----------------------------------------------------------------------------------------------------------------|-----|---------|-------|------|--------------|----------|---------------|------------|-------------------------------------------------------------------------------------------------------------------------------------------------------------------------------|--------------------------------------------------------------------------------------|-----|------------------------|------------|--------------|----|---|
| 230 | Shrinivasan     | India's syndemic of tuberculosis and COVID-19                                                                                                                                                                                         | BMJ Global Health 2020;5:e003979. doi:10.1136/bmjgh-2020-003979                                                 | No  | Peer    | SEARO | LMIC | India        | Children | Immunization  | HMIS       | YES From March 2020 NHM-HMIS reported no new data for the next 3 months. In late August, data for April, May and June finally became available                                | Jan-June 2019 vs 2020                                                                | No  | Decrease               | None       |              | NA |   |
| 231 | Shuka           | Use of healthcare services during the COVID-19 pandemic in urban Ethiopia: evidence from retrospective health facility survey data                                                                                                    | BMJ Open 2022;12:e056745. doi:10.1136/bmjopen-2021-056745                                                       | No  | Peer    | AFRO  | LMIC | Ethiopia     | MCH      | MCH           | HMIS       | None                                                                                                                                                                          | March to June 2019 vs 2020                                                           | No  | Stable                 |            | None         | NA |   |
| 232 | Siddiqi         | Using a low-cost, real-time electronic immunization registry in Pakistan to demonstrate utility of data for immunization programs and evidence-based decision making to achieve SDG-3: Insights from analysis of Big Data on vaccines | International Journal of Medical Informatics Volume 149, May 2021, 104413                                       | No  | Peer    | SEARO | LMIC | Pakistan     | Children | Immunizations | EIR        | None                                                                                                                                                                          | Feb-April 2020                                                                       | No  | Decrease               |            | None         | NA |   |
| 233 | Silvagni        | Neonatal and Pediatric Emergency Room Visits in a Tertiary Center during the COVID-19 Pandemic in Italy                                                                                                                               | Pediatr. Rep. 2021, 13, 168–176. http://doi.org/10.3390/pediatric13020023                                       | No  | Peer    | EURO  | HIC  | Italy        | Children | EMS           | Hosp IS    | None                                                                                                                                                                          | March–April 2020 (COVID-19) and March–April 2019 (non-COVID-19) w                    | No  | Mixed                  |            | None         | NA |   |
| 234 | Silveira        | Missed childhood immunizations during the COVID-19 pandemic in Brazil: analyses of routine statistics and of a national household survey                                                                                              | medRxiv preprint doi: https://doi.org/10.1101/2020.11.30.20240911;                                              | No  | Pre-Pub | PAHO  | LMIC | Brazil       | Children | Immunization  | EIR        | NO Coverage of the national information system is high, but there are delays in reporting from primary care facilities (not discussed in relation to COVID - standard delays) | 2017-19 vs 2020                                                                      | Yes | Decrease with recovery |            | None         | NA |   |
| 235 | Simon-Tov       | An assessment of treatment, transport, and refusal incidence in a National EMS's routine work during COVID-19                                                                                                                         | American Journal of Emergency Medicine 44 (2021) 45–49 https://doi.org/10.1016/j.ajem.2021.01.051 0735-6757/    | Yes | Peer    | EMRO  | HIC  | Israel       | Maternal | EMS           | EMS IS     | None                                                                                                                                                                          | 2019–2020 March/April periods                                                        | No  | Decrease               | Yes        | Telemedicine | NA |   |
| 236 | Singh           | Impact of COVID-19 pandemic on maternal and child health services in Uttar Pradesh, India                                                                                                                                             | J Family Med Prim Care. 2021 Jan; 10(1): 509–513. doi: 10.4103/jfmpc.jfmpc_1550_20; 10.4103/jfmpc.jfmpc_1550_20 | Yes | Peer    | SEARO | LMIC | India        | MCH      | MCH           | Paper HMIS | None                                                                                                                                                                          | March 2019 vs 2020                                                                   | No  | Decrease               |            | None         | NA |   |
| 237 | Sokolof         | Pediatric emergency department utilization during the COVID-19 pandemic in New York City                                                                                                                                              | American Journal of Emergency Medicine 45 (2021) 100–104 https://doi.org/10.1016/j.ajem.2021.02.029 0735-6757   | No  | Peer    | PAHO  | HIC  | USA          | Children | EMS           | Hosp IS    | NO Common limitations of a retrospective review including dependence on data collection systems that may have missing or incorrect information.                               | March 7th to May 6th 2020, and during the same time period in 2018 and 2019          | No  | Mixed                  |            | None         | NA |   |
| 238 | Sokota          | Pediatric tertiary emergency care departments in Zagreb, Rijeka, and Split before and during the coronavirus disease 2019 pandemic: a Croatian national multicenter study                                                             | Croat Med J. 2021;62:580-9 https://doi.org/10.3325/cmj.2021.62.580                                              | Yes | Peer    | EURO  | HIC  | Croatia      | Children | EMS           | EMR        | None                                                                                                                                                                          | February 25-April 25, 2018 and 2019 (preCOVID years), and February 25-April 24, 2020 | No  | Decrease               |            | None         | NA |   |
| 239 | Solo-Josephson  | Patient and Visit Characteristics of Families Accessing Pediatric Urgent Care Telemedicine During the COVID-19 Pandemic                                                                                                               | ELEMEDICINE and e-HEALTH/MARY ANN LIEBERT, INC. VOL. 28 NO. 4/APRIL 2022DOI: 10.1089/rmj.2021.0135              | Yes | Peer    | PAHO  | HIC  | USA          | Children | EMS           | HMIS       | None                                                                                                                                                                          | January to May 2019, 2020                                                            | No  | Increase               | Yes        | Telemedicine | NA |   |
| 240 | Soma, Pattinson | The effect of the first wave of Covid-19 on use of maternal and reproductive health services and maternal deaths in South Africa                                                                                                      | O&G Forum 2020; 30: 36 - 44                                                                                     | No  | Peer    | AFRO  | LMIC | South Africa | Maternal | Mat Health    | HMIS       | None                                                                                                                                                                          | Q1-3 2019 vs Q1-3 2020                                                               | Yes | Decrease               | IncreaseMM | None         | NA |   |

|     | A          | C                                                                                                                                                                                                                                      | D                                                                                                                            | E   | F                | G    | H    | I         | J        | K          | M             | N                                                                                                                                                                                                                                                                                                                                                                                                                                                                                                                                                                                                                                                                                                                                                                                                                                         | O                                                                                                                                               | P   | S        | T          | U    | V                  | Y                                                             |    |
|-----|------------|----------------------------------------------------------------------------------------------------------------------------------------------------------------------------------------------------------------------------------------|------------------------------------------------------------------------------------------------------------------------------|-----|------------------|------|------|-----------|----------|------------|---------------|-------------------------------------------------------------------------------------------------------------------------------------------------------------------------------------------------------------------------------------------------------------------------------------------------------------------------------------------------------------------------------------------------------------------------------------------------------------------------------------------------------------------------------------------------------------------------------------------------------------------------------------------------------------------------------------------------------------------------------------------------------------------------------------------------------------------------------------------|-------------------------------------------------------------------------------------------------------------------------------------------------|-----|----------|------------|------|--------------------|---------------------------------------------------------------|----|
| 241 | Stout      | Use of Electronic Medical Records to Estimate Changes in Pregnancy and Birth Rates During the COVID-19 Pandemic                                                                                                                        | JAMA Network Open. 2021;4(6):e2111621. doi:10.1001/jamanetworkopen.2021.11621 [Reprinted] June 3, 2021 1/10                  | No  | Peer             | PAHO | HIC  | USA       | Maternal | Mat Health | EMR           | None                                                                                                                                                                                                                                                                                                                                                                                                                                                                                                                                                                                                                                                                                                                                                                                                                                      | a Prelockdown period was January 1, 2020, to March 28, 2020. b Postlockdown period was March 29, 2020, to June 14, 2020.                        | No  | Decrease |            | None |                    | NA                                                            |    |
| 242 | Stowe      | Stillbirths During the COVID-19 Pandemic in England, April-June 2020                                                                                                                                                                   | JAMA January 5, 2021 Volume 325, Number 1 (R)                                                                                | Yes | Peer             | EURO | HIC  | UK        | Newborn  | Stillbirth | Hosp IS       | None                                                                                                                                                                                                                                                                                                                                                                                                                                                                                                                                                                                                                                                                                                                                                                                                                                      | April 1, 2019, to June 30, 2020                                                                                                                 | No  | Stable   |            | No   |                    | NA                                                            |    |
| 243 | SUGAND     | Impact of the COVID-19 pandemic on paediatric orthopaedic trauma workload in central London: a multi-centre longitudinal observational study over the "golden weeks"                                                                   | Acta Orthopaedica 2020; 91 (6): 633-638                                                                                      | No  | Peer             | Euro | HIC  | UK        | Children | EMS        | EMS IS        | None                                                                                                                                                                                                                                                                                                                                                                                                                                                                                                                                                                                                                                                                                                                                                                                                                                      | March 24) to the April 28, 2020 vs same in 2019                                                                                                 | No  | Decrease |            | None |                    | NA                                                            |    |
| 244 | Sun        | Effect of delayed obstetric labor care during the COVID-19 pandemic on perinatal outcomes                                                                                                                                              | Int J Gynecol Obstet 2020; 151: 287-307                                                                                      | Yes | Peer             | PAHO | LMIC | Brazil    | MNH      | MNH        | EMR           | None                                                                                                                                                                                                                                                                                                                                                                                                                                                                                                                                                                                                                                                                                                                                                                                                                                      | March11andJune11, 2019andMarch11andJune11,2020                                                                                                  | No  | Decrease | StableMM   | No   |                    | NA                                                            |    |
| 245 | Taquechel  | Pediatric Asthma Health Care Utilization, Viral Testing, and Air Pollution Changes During the COVID-19 Pandemic                                                                                                                        | J ALLERGY CLIN IMMUNOL PRACT VOLUME 8, NUMBER 10                                                                             | No  | Peer             | PAHO | HIC  | USA       | Children | Specialty  | Hosp IS       | None                                                                                                                                                                                                                                                                                                                                                                                                                                                                                                                                                                                                                                                                                                                                                                                                                                      | January 17 to May 17, 2015 vs same period 2020                                                                                                  | No  | Decrease | DecreaseMM | Yes  | Telemedicine       | Possible reduced disease due to PH measures and decreased RSV |    |
| 246 | Thekkur    | Operational Research to Assess the Real-Time Impact of COVID-19 on TB and HIV Services: The Experience and Response from Health Facilities in Harare, Zimbabwe                                                                         | Trop. Med. Infect. Dis. 2021, 6, 94. https://doi.org/10.3390/tropicalmed6020094                                              | Yes | Peer             | AFRO | LMIC | Zimbabwe  | Children | HIV/TB     | HMIS          | None                                                                                                                                                                                                                                                                                                                                                                                                                                                                                                                                                                                                                                                                                                                                                                                                                                      | March 2019 and February 2021: March 2020 to February 2021 was the COVID-19 period, and March 2019 to February 2020 was the pre-COVID-19 period. | Yes | Decrease |            | Yes  | Data for targeting | Unable to reverse decreases                                   |    |
| 247 | Thekkur    | Assessing the Impact of COVID-19 on TB and HIV Programme Services in Lilongwe, Malawi: Operational Research in Real Time                                                                                                               | Trop. Med. Infect. Dis. 2021, 6, 81. https://doi.org/10.3390/tropicalmed6020081                                              | Yes | Peer             | AFRO | LMIC | Malawi    | Children | HIV/TB     | HMIS          | None                                                                                                                                                                                                                                                                                                                                                                                                                                                                                                                                                                                                                                                                                                                                                                                                                                      | March 2019-Feb2020 vs March 2020-Feb2021                                                                                                        | Yes | Decrease |            | None |                    | NA                                                            |    |
| 248 | Todd       | Changes in infection-related hospitalizations in children following pandemic restrictions: an interrupted time-series analysis of total population data                                                                                | International Journal of Epidemiology, 2021, 1435-1443 doi: 10.1093/ije/dyab101                                              | Yes | Peer             | WPRO | HIC  | Australia | Children | Hosp       | Admin/Billing | None                                                                                                                                                                                                                                                                                                                                                                                                                                                                                                                                                                                                                                                                                                                                                                                                                                      | 1 January 2015 to 3 October 2020                                                                                                                | Yes | Decrease | DecreaseMM | No   |                    | NA                                                            |    |
| 249 | Uganda MOH | The effects of the COVID-19 pandemic on the continuity of essential health services delivery, access, and uptake in Uganda AUGUST 2020 Immunization, Gender-based Violence, Maternal Newborn and Child Health, Nutrition, Tuberculosis | http://library.health.go.ug/publications/disease-surveillance-outbreaks/effect-covid-19-pandemic-continuity-essential-health | Yes | Country Database | AFRO | LMIC | Uganda    | MCH      | MCH        | HMIS          | YES % of facilities report 105:1 form 95%. Reporting rates on an indicator are low due to challenges, unstable internet connections, low accessibility to 105:1 form. Also affects data quality, observe unexpected trends across all Nutrition indicators, numbers can double or more in just one-month time. could be due to issues related to HMIS data entry, low reporting rates (62%, 9%, 23%) are also problem for nutrition indicators. Data entry. The data in DHIS2 is collected by several individuals, who can easily make mistakes when entering data. numbers might be affected by low reporting rates, late reporting, or wrong data entry in order to support better data-driven decision-making, health facilities need additional support to improve indicator reporting on all indicators in a timely and correct way. | Jan-Aug 2018/2019 vs 2020                                                                                                                       | No  | Mixed    | MixedMM    | None |                    |                                                               | NA |

|     | A              | C                                                                                                                                                                                 | D                                                                                                                                                                 | E   | F    | G    | H    | I         | J        | K            | M                | N                                                                                                                                          | O                                                                                                                                                    | P   | S                             | T          | U  | V                       | Y                                                                                                                                                                                           |
|-----|----------------|-----------------------------------------------------------------------------------------------------------------------------------------------------------------------------------|-------------------------------------------------------------------------------------------------------------------------------------------------------------------|-----|------|------|------|-----------|----------|--------------|------------------|--------------------------------------------------------------------------------------------------------------------------------------------|------------------------------------------------------------------------------------------------------------------------------------------------------|-----|-------------------------------|------------|----|-------------------------|---------------------------------------------------------------------------------------------------------------------------------------------------------------------------------------------|
| 250 | Utria          | Impact of COVID-19 on procedure volume at a tertiary pediatric hospital                                                                                                           | The American Journal of Surgery 221 (2021) 1259e1261<br><a href="https://doi.org/10.1016/j.amjsurg.2021.03.003">https://doi.org/10.1016/j.amjsurg.2021.03.003</a> | No  | Peer | PAHO | HIC  | USA       | Children | Specialty    | EMR/EHR          | YES Limited by the lack of data on 1) cancelled procedures secondary to the elective nature of the procedure or a positive COVID-19 result | March 19th, 2020 to May 18th, 2020, or during the same period during the year prior, March 19th, 2019 to May 18th, 2019                              | No  | Mixed                         | Yes        |    | Epidemic Prev & Control | COVID tests none positive                                                                                                                                                                   |
| 251 | Velasco-Arnaiz | Pediatric antimicrobial stewardship in the COVID-19 outbreak                                                                                                                      | Infection Control & Hospital Epidemiology, 42: 642–644, <a href="https://doi.org/10.1017/ice.2020.312">https://doi.org/10.1017/ice.2020.312</a>                   | Yes | Peer | EURO | HIC  | Spain     | Children | Specialty    | Surveillance     | None                                                                                                                                       | March-Apr 2019 vs 2020                                                                                                                               | No  | Mixed                         | No         |    |                         | NA                                                                                                                                                                                          |
| 252 | Vogel          | COVID-19 pandemic and families' utilization of well-child clinics and pediatric practices attendance in Germany                                                                   | BMC Res Notes (2021) 14:140<br><a href="https://doi.org/10.1186/s13104-021-05562-3">https://doi.org/10.1186/s13104-021-05562-3</a>                                | Yes | Peer | EURO | HIC  | Germany   | Children | Child Health | Network Database | None                                                                                                                                       | March and April in 2020 to the number of visits in 2019,                                                                                             | No  | Decrease with slight Recovery | No         |    |                         | NA                                                                                                                                                                                          |
| 253 | Walker         | COVID-19 and Routine Childhood and Adolescent Immunizations: Evidence from Louisiana Medicaid                                                                                     | Vaccine Volume 40, Issue 6, 7 February 2022, Pages 837-840                                                                                                        | No  | Peer | PAHO | HIC  | USA       | Children | Immunization | Admin/Billing    | None                                                                                                                                       | January 2017 through December 2020.                                                                                                                  | Yes | Decrease                      | No         |    |                         | NA                                                                                                                                                                                          |
| 254 | Wambua         | Quantifying the indirect impact of COVID-19 pandemic on utilisation of outpatient and immunisation services in Kenya: a longitudinal study using interrupted time series analysis | BMI Open 2022;12:e055815.<br><a href="https://doi.org/10.1136/bmjopen-2021-055815">doi:10.1136/bmjopen-2021-055815</a>                                            | Yes | Peer | AFRO | LMIC | Kenya     | MCH      | MCH          | HMIS             | NO Standard data cleaning plus missing value imputation                                                                                    | January 2018 to March 2021                                                                                                                           | No  | Decrease with recovery        | Yes        |    | Relocation of services  | where health facilities designated as vaccination centres were assigned as COVID-19 isolation centres, the vaccines programme moved immunisation services to neighbouring health facilities |
| 255 | Wang           | Maternal and infant outcomes during the COVID-19 pandemic: a retrospective study in Guangzhou, China                                                                              | Reprod Biol Endocrinol (2021) 19:126<br><a href="https://doi.org/10.1186/s12958-021-00807-z">https://doi.org/10.1186/s12958-021-00807-z</a>                       | No  | Peer | WPRO | LMIC | China     | MNH      | MNH          | Paper MR/HR      | None                                                                                                                                       | 24 January to 31 March 2020 (peak period), chose the same types of data at the hospital during the same period in 2019 and 1 January–23 January 2020 | No  | Mixed                         | Yes        |    | Epidemic Prev & Control | Stable outcomes                                                                                                                                                                             |
| 256 | Wanyana        | Rapid assessment on the utilization of maternal and child health services during COVID-19 in Rwanda                                                                               | PHA 2021; 11(1): 12–21 e-ISSN 2220-8372<br><a href="https://doi.org/10.5588/pha.20.0057">https://doi.org/10.5588/pha.20.0057</a>                                  | No  | Peer | AFRO | LMIC | Rwanda    | MCH      | MCH          | HMIS             | None                                                                                                                                       | March and April 2019 (before the COVID-19 outbreak) were compared with those from March and April 2020                                               | No  | Mixed                         | None       |    |                         | NA                                                                                                                                                                                          |
| 257 | Ward           | Describing Changes in Telebehavioral Health Utilization and Services Delivery in Rural School Settings in Pre- and Early Stages of the COVID-19 Public Health Emergency           | J Sch Health. 2022; 92: 452-460. DOI: 10.1111/josh.13150                                                                                                          | No  | Peer | PAHO | HIC  | USA       | Children | Child Health | Network Database | None                                                                                                                                       | Fall 2019 vs spring 2020                                                                                                                             | No  | Increase                      | Yes        |    | Telemedicine            | NA                                                                                                                                                                                          |
| 258 | Weiqin Liu     | Impact of the COVID-19 pandemic on neonatal admissions in a tertiary children's hospital in southwest China: An interrupted time-series study                                     | PLoS ONE 17(1): e0262202. <a href="https://doi.org/10.1371/journal.pone.0262202">https://doi.org/10.1371/journal.pone.0262202</a>                                 | Yes | Peer | WPRO | LMIC | China     | Newborn  | Neonatal     | Paper MR/HR      | None                                                                                                                                       | January 4, 2019, and August 27, 2020                                                                                                                 | No  | Decrease                      | IncreaseMM | No |                         | NA                                                                                                                                                                                          |
| 259 | Williams       | Indirect effects of the COVID-19 pandemic on paediatric healthcare use and severe disease: a retrospective national cohort study                                                  | Arch Dis Child 2021;106:911–917                                                                                                                                   | No  | Peer | EURO | LMIC | UK        | Children | EMS          | HMIS             | None                                                                                                                                       | 2016-2020                                                                                                                                            | Yes | Decrease                      | StableMM   | No |                         | NA                                                                                                                                                                                          |
| 260 | Wong           | Disruption of paediatric orthopaedic hospital services due to the COVID-19 pandemic in a region with minimal COVID-19 illness                                                     | J Child Orthop 2020;14:245-251. DOI: 10.1302/18632548.14.200140                                                                                                   | Yes | Peer | WPRO | HIC  | Australia | Children | Specialty    | Hosp IS          | None                                                                                                                                       | 2019-2020                                                                                                                                            | Yes | Decrease                      | No         |    |                         | NA                                                                                                                                                                                          |
| 261 | Workicho       | Essential Health and Nutrition Service Provision during the COVID-19 Pandemic: Lessons from Select Ethiopian Woredas                                                              | Curr Dev Nutr 2021;5:nzab024                                                                                                                                      | Yes | Peer | AFRO | LMIC | Ethiopia  | Children | Child Health | Paper HMIS       | None                                                                                                                                       | March to July of 2019 and 2020,                                                                                                                      | No  | Decrease with Recovery        | Yes        |    | Multiple                | Recovery of services                                                                                                                                                                        |
| 262 | Yamada         | Do Not Delay: Safe Operation for Pediatric Living-donor Liver Transplantation Programs in the COVID-19 Era                                                                        | Transplantation: March 2021 - Volume 105 - Issue 3 - p e39-e40<br><a href="https://doi.org/10.1097/TP.0000000000000594">doi: 10.1097/TP.0000000000000594</a>      | Yes | Peer | WPRO | HIC  | Japan     | Children | Specialty    | Surveillance     | None                                                                                                                                       | Jan-Oct 2019 vs 2020                                                                                                                                 | Yes | Decrease with Recovery        | IncreaseMM | No |                         | NA                                                                                                                                                                                          |
